# Supplementary material for: Enantioselective α-hydroxylation of β-ketoamides
Source: Royal Society of Chemistry journal article supplement (doi:10.1039/c2ob27283k), 2012-12-18
Supplement: c2ob27283k.pdf [file c2ob27283k.pdf]

## Supporting Information

### Enantioselective $\alpha$ -Hydroxylation of $\beta$ -Ketoamides

Claudia De Fusco, Sara Meninno, Consiglia Tedesco, Alessandra Lattanzi\*

*Dipartimento di Chimica e Biologia, Università di Salerno, Via Ponte don Melillo, 84084,*

*Fisciano, Italy*

*E-mail:lattanzi@unisa.it*

#### Table of contents

|                                                                                  |     |
|----------------------------------------------------------------------------------|-----|
| <b>General Methods</b> .....                                                     | S2  |
| <b>Experimental Procedures and Compounds Characterization</b> .....              | S3  |
| General procedure for the synthesis of $\beta$ -ketoamides .....                 | S3  |
| General procedure for the racemic hydroxylation of compounds 1 .....             | S4  |
| General procedure for the asymmetric hydroxylation of compounds 1a-n .....       | S4  |
| <b>X-Ray Data for the Absolute Configuration Assignment of Compound 3b</b> ..... | S11 |
| <b>NMR Spectra</b> .....                                                         | S12 |
| <b>HPLC chromatograms</b> .....                                                  | S23 |

## General Methods

All reactions requiring dry or inert conditions were conducted in flame dried glassware under a positive pressure of nitrogen. THF was freshly distilled prior to use from LiAlH<sub>4</sub>, chloroform was dried over molecular sieves. Molecular sieves (Aldrich Molecular Sieves, 3 Å, 1.6 mm pellets) were activated under vacuum at 200°C overnight.

Reactions were monitored by thin layer chromatography (TLC) on Merck silica gel plates (0.25 mm) and visualized by UV light. Flash chromatography was performed on Merck silica gel (60, particle size: 0.040–0.063 mm). <sup>1</sup>H NMR and <sup>13</sup>C NMR spectra were recorded on Bruker DRX 400 spectrometer at room temperature in CDCl<sub>3</sub> as solvent. Chemical shifts for protons are reported using residual CHCl<sub>3</sub> as internal reference (δ=7.26 ppm). Carbon spectra were referenced to the shift of the <sup>13</sup>C signal of CDCl<sub>3</sub> (δ=77.0 ppm). Optical rotation measurement of compounds **3a-k** was performed on a Jasco Dip-1000 digital polarimeter using the Na lamp (582 nm). FTIR spectra were recorded as thin films on KBr plates using Bruker Vertex 70 spectrometer and absorption maxima are reported in wavenumber (cm<sup>-1</sup>). ESI-MS was performed using a Bio-Q triple quadrupole mass spectrometer (Micromass, Manchester, UK) equipped with an electrospray ion source. Melting points were measured on a digital Electrothermal 9100 apparatus.

Petrol ether (PE) refers to light petroleum ether (boiling point 40-60°C). Anhydrous toluene, TBHP (5-6 M in decane), and all starting materials (unless otherwise noted) were purchased from Aldrich and used as received. 1-Isocyanato-4-(pentyloxy)benzene was synthesized according to procedures reported in the literature.<sup>1</sup> The cinchona derived thiourea **eHQNT** has been synthesized as reported in the literature.<sup>2</sup>

Enantiomeric excess of products **3** was determined by HPLC analysis (Waters-Breeze 2487, UV dual λ absorbance detector and 1525 Binary HPLC Pump) using Daicel chiral columns.

---

<sup>1</sup> (a) D. V. N., Hardy, *J. Chem. Soc.* **1934**, 2001. (b) N. Kihara, K. Hinoue, T. Takata, *Macromolecules* **2005**, *38*, 223. (c) H. Yi-Lin, H. Wie-Chung, L. Yi-Hung, P. Shie-Ming, C. Sheng-Hsien, *Angew. Chem. Int. Ed.* **2007**, *46*, 6629.

<sup>2</sup> B. Vakulya, S. Varga, A. Csámpai, T. Soós, *Org. Lett.* **2005**, *7*, 1967.

## Experimental Procedures and Compounds Characterization

### General procedure for the synthesis of $\beta$ -ketoamides

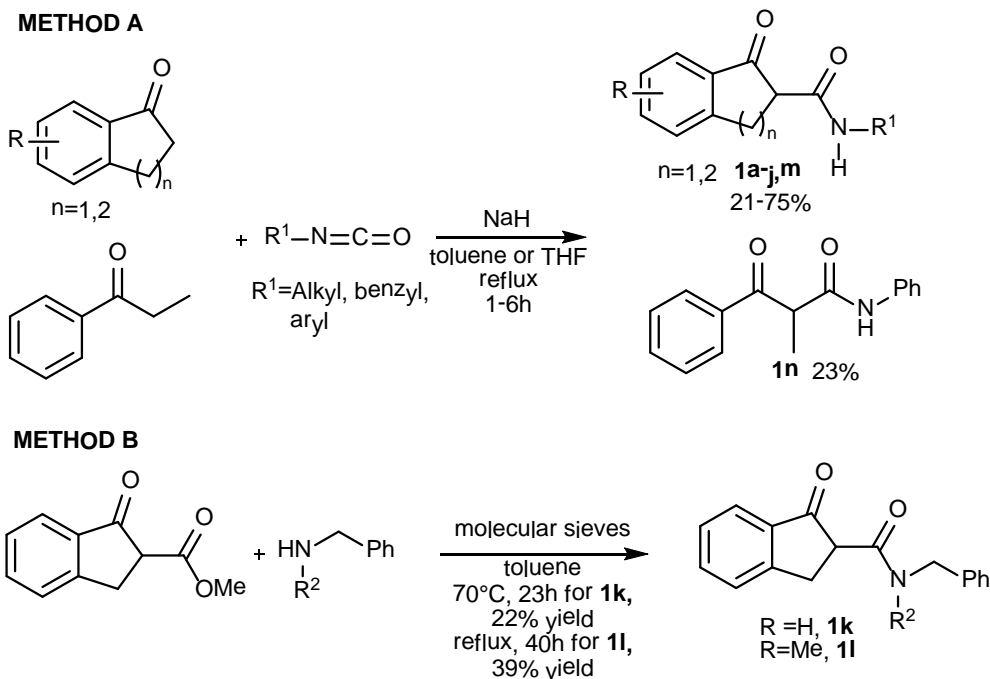

METHOD A:  $\beta$ -ketoamides **1a-j, m** were prepared following a general procedure reported in the literature.<sup>3</sup>

In a two necked round bottom flask under a positive pressure of nitrogen, NaH (60% w/w dispersion in mineral oil, 10 mmol) was suspended in dry THF (10 mL) for 10 minutes under stirring. The suspension was allowed to settle and after removal of the supernatant, fresh THF (10 mL) was added. A solution of the appropriate indanone or  $\alpha$ -tetralone (4 mmol) and isocyanate (4.8 mmol) in dry THF (1.5 mL) was added dropwise over 10 minutes to the refluxing suspension. After completion, monitored by TLC (eluent: PE/ AcOEt 8:2) the mixture was cooled to 0°C and 1 N HCl was added cautiously until the solid completely dissolved ( $\approx$  15 mL). The solution was extracted with ethyl acetate (2 x 20 mL) and the organic phase was washed with saturated NaHCO<sub>3</sub> (20 mL), brine (20 mL), dried (Na<sub>2</sub>SO<sub>4</sub>) and concentrated. The residue was triturated with Et<sub>2</sub>O to give the desired compound as yellow/white solid.

METHOD B:  $\beta$ -ketoamides **1k** and **1l** were prepared by using a general procedure reported in the literature.<sup>4</sup>

The  $\beta$ -ketoester (4 mmol) and appropriate benzylamine (8 mmol) in dry toluene (40 mL) were heated to reflux or to 70°C under nitrogen over molecular sieves for the necessary time (monitoring

<sup>3</sup> T. A. Moss, A. Alba, D. Hepworth, D. J. Dixon, *Chem. Commun.*, **2008**, 2474.

<sup>4</sup> A. Russo, G. Galdi, G. Croce, A. Lattanzi, *Chem. Eur. J.* **2012**, *18*, 6152.

by TLC, PE/AcOEt 8:2 as eluent). Then molecular sieves were filtered off, and the mixture was purified by flash chromatography, using PE/AcOEt 9:1 to 7:3 as eluent, to give compounds **1k**, **1l**.

### General procedure for the racemic hydroxylation of compounds **1**

In a sample vial, the appropriate  $\beta$ -ketoamide **1** (0.10 mmol), TBHP (0.12 mmol), and 2-piperidinemethanol (3.5 mg, 0.03 mmol) were dissolved in dry  $\text{CHCl}_3$  or anhydrous toluene (0.5 mL). The reaction was stirred at room temperature for 17-41 h until completion, monitored by TLC (PE/AcOEt 8:2 or 7:3). After removing the solvent under vacuum, the mixture was directly purified by flash chromatography (PE/AcOEt 9:1 to 7:3) to give products **3** in 34-97%.

### General procedure for the asymmetric hydroxylation of compounds **1a-n**

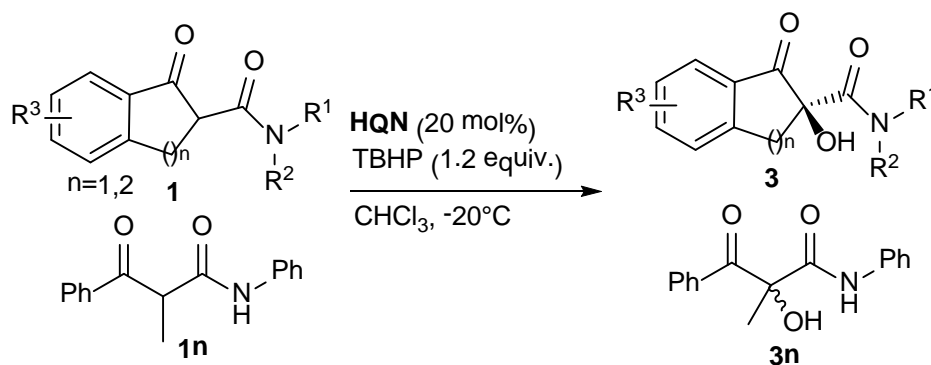

To a sample vial charged with the appropriate  $\beta$ -ketoamide **1** (0.10 mmol) and the hydroquinone (6.5 mg, 0.02 mmol) in anhydrous chloroform (2.0 mL), TBHP (0.12 mmol) was added and the reaction was stirred at  $-20^\circ\text{C}$  for 64-144 h until completion (monitored by TLC, PE/AcOEt 8:2 or 7:3). The solvent was removed under vacuum and the product **3** was isolated by flash chromatography (PE/AcOEt 9:1 to 7:3). The absolute configuration of compounds **3** was assigned to be (*S*) by analogy to the structure determined by single-crystal X-ray analysis performed on compound **3b** (see the X-ray analysis section). Crystallization using *n*-hexane/ $\text{CHCl}_3$  or *n*-pentane/ $\text{CHCl}_3$  mixtures performed at room temperature gave needle-shaped crystals in an enantioenriched form.

**(S)-2-hydroxy-1-oxo-N-phenyl-2,3-dihydro-1H-indene-2-carboxamide (3a)**

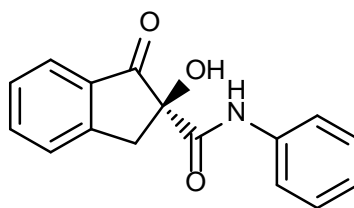

White solid (83% yield, 66% after crystallization), **mp** 149.9-151.3 °C.  $[\alpha]_{\text{D}}^{25} = +6.4$  (*c* 0.6, CHCl<sub>3</sub>), *ee* 87%. **FTIR**  $\nu_{\text{max}}$  (KBr)/cm<sup>-1</sup> 3342, 1719, 1654, 1599, 1533, 1445, 750. **<sup>1</sup>H NMR** (CDCl<sub>3</sub>, 400 MHz):  $\delta$  8.83 (bs, 1H), 7.77 (d, 1H, *J* = 7.7 Hz), 7.67 (t, 1H, *J* = 7.2 Hz), 7.52-7.50 (m, 3H), 7.42 (t, 1H, *J* = 7.2 Hz), 7.29 (t, 2H, *J* = 7.5 Hz), 7.11 (t, 1H, *J* = 7.1 Hz), 4.36 (bs, 1H), 3.87 (d, 1H, *J* = 16.8 Hz), 3.18 (d, 1H, *J* = 16.8 Hz). **<sup>13</sup>C NMR** (CDCl<sub>3</sub>, 100 MHz):  $\delta$  203.2, 168.4, 153.1, 136.9, 136.5, 133.7, 129.0, 128.1, 126.4, 125.2, 124.7, 119.7, 82.6, 40.8. **MS** (ESI *m/z*) 268.10 [MH<sup>+</sup>, 100%], 290.09 [MNa<sup>+</sup>, 85%]. HPLC analysis with Chiralcel ODH column, 70:30 *n*-hexane:2-propanol, 1 mL/min, detection at 254 nm; minor enantiomer *t*<sub>R</sub> = 9.1 min, major enantiomer *t*<sub>R</sub> = 6.4 min.

**(S)-4-bromo-2-hydroxy-1-oxo-N-phenyl-2,3-dihydro-1H-indene-2-carboxamide (3b)**

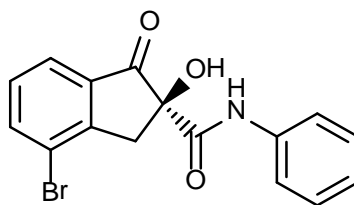

White solid (88% yield, 66% after crystallization), **mp** 171.9-173.6 °C.  $[\alpha]_{\text{D}}^{25} = +50.0$  (*c* 0.6, CHCl<sub>3</sub>), *ee* 96%. **FTIR**  $\nu_{\text{max}}$  (KBr)/cm<sup>-1</sup> 3339, 1728, 1657, 1598, 1533, 1445, 1267, 1120, 943, 753, 692. **<sup>1</sup>H NMR** (CDCl<sub>3</sub>, 400 MHz):  $\delta$  8.70 (bs, 1H), 7.84 (d, 1H, *J* = 7.8 Hz), 7.76 (d, 1H, *J* = 7.6 Hz), 7.53 (d, 2H, *J* = 8.4 Hz), 7.36-7.29 (m, 3H), 7.15-7.11 (m, 1H), 3.84 (d, 1H, *J* = 17.3 Hz), 3.72 (bs, 1H), 3.12 (d, 1H, *J* = 17.3 Hz). **<sup>13</sup>C NMR** (CDCl<sub>3</sub>, 100 MHz):  $\delta$  202.6, 168.0, 152.7, 139.1, 136.7, 135.7, 129.8, 129.0, 124.9, 123.9, 121.7, 119.7, 82.2, 41.9. **MS** (ESI *m/z*) 346.00 [MH<sup>+</sup>, 100%], 368.05 [MNa<sup>+</sup>, 25%]. HPLC analysis with Chiralcel ODH column, 80:20 *n*-hexane:2-propanol, 1 mL/min, detection at 254 nm; minor enantiomer *t*<sub>R</sub> = 8.5 min, major enantiomer *t*<sub>R</sub> = 9.4 min.

**(S)-5-chloro-2-hydroxy-1-oxo-N-phenyl-2,3-dihydro-1H-indene-2-carboxamide (3c)**

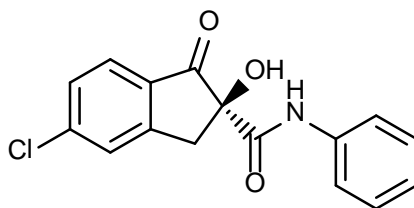

Pale yellow solid (85% yield), **mp** 182.7-183.1 °C.  $[\alpha]_{\text{D}}^{23} = +48.9$  (*c* 0.6, CHCl<sub>3</sub>), *ee* 79%. **FTIR**  $\nu_{\text{max}}$  (KBr)/cm<sup>-1</sup> 3307, 1732, 1646, 1449, 1081, 759. **<sup>1</sup>H NMR** (CDCl<sub>3</sub>, 400 MHz):  $\delta$  8.70 (bs, 1H), 7.73 (d, 1H, *J* = 8.2 Hz), 7.53-7.51 (m, 3H), 7.41 (d, 1H, *J* = 7.9 Hz), 7.33-7.29 (m, 2H), 7.13 (t, 1H, *J* = 7.4 Hz), 3.84 (d, 1H, *J* = 16.9 Hz), 3.80 (bs, 1H), 3.17 (d, 1H, *J* = 16.9 Hz) **<sup>13</sup>C NMR** (CDCl<sub>3</sub>, 100 MHz):  $\delta$  201.6, 167.8, 154.3, 143.3, 136.7, 132.1, 129.1, 126.7, 126.2, 124.9, 119.7, 82.8, 40.6. **MS** (ESI *m/z*) 301.97 [MH<sup>+</sup>, 8%], 324.02 [MNa<sup>+</sup>, 100%]. HPLC analysis with Chiralcel ODH column, 70:30 *n*-hexane:2-propanol, 1 mL/min, detection at 254 nm; minor enantiomer *t<sub>R</sub>* = 9.6 min, major enantiomer *t<sub>R</sub>* = 7.0 min.

**(S)-5-bromo-2-hydroxy-1-oxo-N-phenyl-2,3-dihydro-1H-indene-2-carboxamide (3d)**

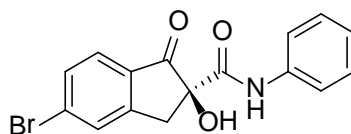

White solid (87% yield), **mp** 187.1-188.3 °C.  $[\alpha]_{\text{D}}^{26} = +45.1$  (*c* 0.9, CHCl<sub>3</sub>), *ee* 78%. **FTIR**  $\nu_{\text{max}}$  (KBr)/cm<sup>-1</sup> 3355, 1723, 1659, 1595, 1532, 1445, 1219, 772. **<sup>1</sup>H NMR** (CDCl<sub>3</sub>, 400 MHz):  $\delta$  8.70 (bs, 1H), 7.71 (s, 1H), 7.66 (d, 1H, *J* = 8.2 Hz), 7.58 (d, 1H, *J* = 8.0 Hz), 7.52 (d, 2H, *J* = 8.6 Hz), 7.33-7.30 (m, 2H), 7.15-7.11 (m, 1H), 3.84 (d, 1H, *J* = 17.1 Hz), 3.75 (bs, 1H), 3.18 (d, 1H, *J* = 17.1 Hz) **<sup>13</sup>C NMR** (CDCl<sub>3</sub>, 100 MHz):  $\delta$  201.8, 167.8, 154.3, 136.8, 132.5, 132.2, 131.9, 129.7, 129.1, 126.2, 124.9, 119.7, 82.8, 40.5 **MS** (ESI *m/z*) 367.91 [MNa<sup>+</sup>, 100%]. HPLC analysis with Chiralcel ODH column, 70:30 *n*-hexane:2-propanol, 1 mL/min, detection at 254 nm; minor enantiomer *t<sub>R</sub>* = 10.0 min, major enantiomer *t<sub>R</sub>* = 7.8 min.

**(S)-2-hydroxy-6-methoxy-1-oxo-N-phenyl-2,3-dihydro-1H-indene-2-carboxamide (3e)**

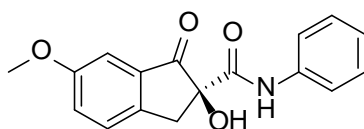

White solid (84% yield, 60% after crystallization), **mp** 146.0-147.2 °C.  $[\alpha]_{\text{D}}^{20} = -31.3$  (*c* 0.9, CHCl<sub>3</sub>), *ee* 98%. **FTIR**  $\nu_{\text{max}}$  (KBr)/cm<sup>-1</sup> 3343, 1717, 1661, 1600, 1532, 1494, 1445, 1281, 1241, 1026, 754. **<sup>1</sup>H NMR** (CDCl<sub>3</sub>, 400 MHz):  $\delta$  8.79 (bs, 1H), 7.48 (d, 2H, *J* = 7.7 Hz), 7.36 (d, 1H, *J* = 8.4 Hz), 7.29-7.27 (m, 1H), 7.25-7.23 (m, 2H) 7.15 (d, 1H, *J* = 2.5 Hz), 7.09 (t, 1H, *J* = 7.4 Hz), 4.40 (bs, 1H), 3.80 (s, 3H), 3.75 (d, 1H, *J* = 16.6 Hz), 3.08 (d, 1H, *J* = 16.5 Hz). **<sup>13</sup>C NMR** (CDCl<sub>3</sub>, 100 MHz):  $\delta$  203.1, 168.5, 159.7, 146.1, 136.9, 134.8, 128.9, 127.1, 125.9, 124.7, 119.7, 106.1, 83.2, 55.6, 40.2, **MS** (ESI *m/z*) 297.95 [MH<sup>+</sup>, 17%], 320.07 [MNa<sup>+</sup>, 100%], 336.07 [MK<sup>+</sup>, 8%]. HPLC analysis with Chiralcel ODH column, 70:30 *n*-hexane:2-propanol, 1 mL/min, detection at 254 nm; minor enantiomer *t<sub>R</sub>* = 10.9 min, major enantiomer *t<sub>R</sub>* = 7.5 min.

**(S)-2-hydroxy-N-(naphthalen-1-yl)-1-oxo-2,3-dihydro-1H-indene-2-carboxamide (3f)**

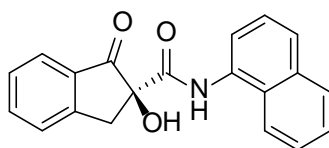

Pale yellow solid (82% yield), **mp** 166.2-167.5 °C.  $[\alpha]_{\text{D}}^{21} = +28.9$  (*c* 0.6, CHCl<sub>3</sub>), *ee* 74%. **FTIR**  $\nu_{\text{max}}$  (KBr)/cm<sup>-1</sup> 3368, 1722, 1661, 1538, 1532, 1500, 1219, 772. **<sup>1</sup>H NMR** (CDCl<sub>3</sub>, 400 MHz):  $\delta$  9.23 (bs, 1H), 7.98 (d, 1H, *J* = 7.5 Hz), 7.89-7.81 (m, 3H), 7.68-7.66 (m, 2H), 7.57-7.48 (m, 3H), 7.44-7.40 (m, 2H), 4.09 (bs, 1H), 3.94 (d, 1H, *J* = 16.7 Hz), 3.26 (d, 1H, *J* = 16.7 Hz) **<sup>13</sup>C NMR** (CDCl<sub>3</sub>, 100 MHz):  $\delta$  203.0, 168.6, 153.0, 136.5, 134.0, 133.7, 131.3, 128.7, 128.2, 126.53, 126.48, 126.42, 126.0, 125.8, 125.6, 125.3, 120.2, 119.6, 83.1, 40.8 **MS** (ESI *m/z*) 318.10 [MH<sup>+</sup>, 40%], 340.09 [MNa<sup>+</sup>, 100%], 355.90 [MK<sup>+</sup>, 25%]. HPLC analysis with Chiralpak ASH column, 70:30 *n*-hexane:2-propanol, 0.8 mL/min, detection at 254 nm; minor enantiomer *t<sub>R</sub>* = 12.4 min, major enantiomer *t<sub>R</sub>* = 16.4 min.

**(S)-N-(2-chlorophenyl)-2-hydroxy-1-oxo-2,3-dihydro-1H-indene-2-carboxamide (3g)**

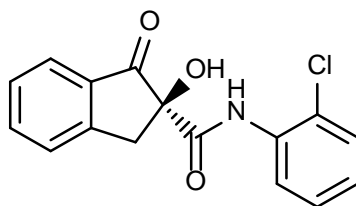

White solid (76% yield, 48% after crystallization), **mp** 90.3-93.0 °C.  $[\alpha]_D^{21} = +22.8$  (*c* 0.6, CHCl<sub>3</sub>), *ee* 99%. **FTIR**  $\nu_{max}$  (KBr)/cm<sup>-1</sup> 3352, 1723, 1685, 1594, 1529, 1443, 1304, 1214, 751. **<sup>1</sup>H NMR** (CDCl<sub>3</sub>, 400 MHz):  $\delta$  9.31 (bs, 1H), 8.31 (dd, 1H,  $J_1 = 8.2$ ,  $J_2 = 1.3$  Hz), 7.84 (d, 1H,  $J = 7.8$  Hz), 7.73-7.69 (m, 1H), 7.54 (d, 1H,  $J = 7.8$  Hz), 7.48-7.44 (m, 1H), 7.38 (dd, 1H,  $J_1 = 8.1$ ,  $J_2 = 1.3$  Hz), 7.23-7.21 (m, 1H), 7.08-7.03 (m, 1H), 3.86 (d, 1H,  $J = 16.8$  Hz), 3.78 (bs, 1H), 3.27 (d, 1H,  $J = 16.8$  Hz) **<sup>13</sup>C NMR** (CDCl<sub>3</sub>, 100 MHz):  $\delta$  202.6, 168.6, 152.7, 136.5, 133.7, 129.1, 128.2, 127.7, 126.4, 125.3, 125.1, 123.2, 121.0, 82.9, 40.8 **MS** (ESI *m/z*) 302.10 [MH<sup>+</sup>, 13%], 324.02 [MNa<sup>+</sup>, 100%], 340.03 [MK<sup>+</sup>, 5%]. HPLC analysis with Chiralcel ODH column, 80:20 *n*-hexane:2-propanol, 1 mL/min, detection at 254 nm; minor enantiomer  $t_R = 6.4$  min, major enantiomer  $t_R = 7.4$  min.

**(S)-2-hydroxy-1-oxo-N-(3-(trifluoromethyl)phenyl)-2,3-dihydro-1H-indene-2-carboxamide (3h)**

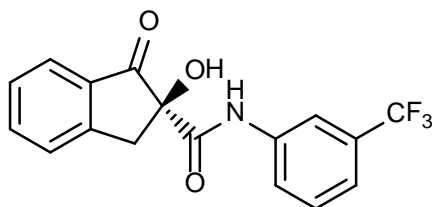

Pale yellow solid (88% yield), **mp** 138.4-139.8 °C.  $[\alpha]_D^{26} = +9.7$  (*c* 0.5, CHCl<sub>3</sub>), *ee* 56%. **FTIR**  $\nu_{max}$  (KBr)/cm<sup>-1</sup> 3333, 1719, 1682, 1603, 1542, 1449, 1333, 1167, 1125, 772, 698. **<sup>1</sup>H NMR** (CDCl<sub>3</sub>, 400 MHz):  $\delta$  8.93 (bs, 1H), 7.93 (s, 1H), 7.80 (d, 1H,  $J = 7.7$  Hz), 7.72-7.68 (m, 1H), 7.64 (d, 1H,  $J = 7.9$  Hz), 7.52 (d, 1H,  $J = 7.7$  Hz), 7.46-7.41 (m, 1H), 7.39-7.35 (m, 2H), 3.95 (bs, 1H), 3.88 (d, 1H,  $J = 16.7$  Hz), 3.21 (d, 1H,  $J = 16.7$  Hz) **<sup>13</sup>C NMR** (CDCl<sub>3</sub>, 100 MHz):  $\delta$  202.8, 168.6, 152.9, 137.4, 136.7, 133.5, 131.5 (q,  $J = 32$  Hz), 129.5, 128.3, 126.4, 125.3, 122.6, 121.3 (d,  $J = 36$  Hz), 116.5 (d,  $J = 36$  Hz), 82.9, 40.8 **MS** (ESI *m/z*) 336.06 [MH<sup>+</sup>, 5%], 358.04 [MNa<sup>+</sup>, 100%]. HPLC analysis with Chiralpak ASH column, 70:30 *n*-hexane:2-propanol, 0.8 mL/min, detection at 254 nm; minor enantiomer  $t_R = 6.5$  min, major enantiomer  $t_R = 8.1$  min.



**(S)-2-hydroxy-1-oxo-N-(4-(pentyloxy)phenyl)-2,3-dihydro-1H-indene-2-carboxamide (3i)**

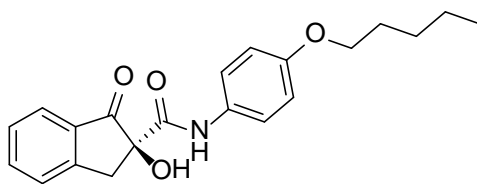

White solid (89% yield), **mp** 125.6-127.0 °C.  $[\alpha]_{\text{D}}^{23} = +2.8$  (*c* 0.6, CHCl<sub>3</sub>), *ee* 76%. **FTIR**  $\nu_{\text{max}}$  (KBr)/cm<sup>-1</sup> 3325, 2930, 1721, 1645, 1512, 1220, 828, 772. **<sup>1</sup>H NMR** (CDCl<sub>3</sub>, 400 MHz):  $\delta$  8.70 (bs, 1H), 7.74 (d, 1H, *J* = 7.7 Hz), 7.66-7.62 (m, 1H), 7.46 (d, 1H, *J* = 7.7 Hz), 7.40-7.35 (m, 3H), 6.77 (d, 2H, *J* = 9.0 Hz), 4.35 (bs, 1H), 3.88 (t, 2H, *J* = 6.6 Hz), 3.82 (d, 1H, *J* = 16.8 Hz), 3.13 (d, 1H, *J* = 16.8 Hz), 1.79-1.73 (m, 2H), 1.44-1.34 (m, 4H), 0.92 (t, 3H, *J* = 7.0 Hz). **<sup>13</sup>C NMR** (CDCl<sub>3</sub>, 100 MHz):  $\delta$  203.4, 168.1, 156.2, 153.2, 136.4, 133.7, 129.9, 128.0, 126.4, 125.1, 121.3, 114.7, 82.5, 68.2, 40.8, 28.9, 28.1, 22.4, 14.0. **MS** (ESI *m/z*) 354.24 [MH<sup>+</sup>, 100%], 376.17 [MNa<sup>+</sup>, 10%]. HPLC analysis with Chiralcel ODH column, 70:30 *n*-hexane:2-propanol, 1 mL/min, detection at 254 nm; minor enantiomer *t*<sub>R</sub> = 7.3 min, major enantiomer *t*<sub>R</sub> = 8.7 min.

**(S)-N-cyclohexyl-2-hydroxy-1-oxo-2,3-dihydro-1H-indene-2-carboxamide (3j)**

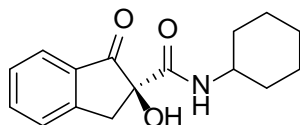

White wax (37% yield).  $[\alpha]_{\text{D}}^{30} = -7.2$  (*c* 0.7, CHCl<sub>3</sub>), *ee* 40%. **FTIR**  $\nu_{\text{max}}$  (KBr)/cm<sup>-1</sup> 3353, 2930, 2855, 1723, 1646, 1530, 1465, 1215, 752. **<sup>1</sup>H NMR** (CDCl<sub>3</sub>, 400 MHz):  $\delta$  7.76 (d, 1H, *J* = 7.7 Hz), 7.64 (t, 1H, *J* = 7.0 Hz), 7.47 (d, 1H, *J* = 7.7 Hz), 7.40 (t, 1H, *J* = 7.5 Hz), 6.69 (d, 1H, *J* = 6.6 Hz), 3.79 (bs, 1H), 3.72 (d, 1H, *J* = 16.8 Hz), 3.68-3.63 (m, 1H), 3.10 (d, 1H, *J* = 16.8 Hz), 1.89-1.86 (m, 2H), 1.70-1.57 (m, 4H), 1.36-1.14 (m, 4H). **<sup>13</sup>C NMR** (CDCl<sub>3</sub>, 100 MHz):  $\delta$  203.4, 169.2, 152.9, 136.2, 133.9, 128.0, 126.3, 125.1, 82.1, 48.4, 40.7, 32.83, 32.77, 29.7, 25.4, 24.7. **MS** (ESI *m/z*) 274.13 [MH<sup>+</sup>, 97%], 296.06 [MNa<sup>+</sup>, 100%]. HPLC analysis with Chiralcel ODH column, 80:20 *n*-hexane:2-propanol, 1 mL/min, detection at 254 nm; minor enantiomer *t*<sub>R</sub> = 5.3 min, major enantiomer *t*<sub>R</sub> = 6.2 min.

**(S)-N-benzyl-2-hydroxy-1-oxo-2,3-dihydro-1H-indene-2-carboxamide (3k)**

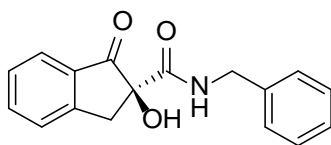

Yellow wax (50% yield).  $[\alpha]_D^{23} = -4.1$  (*c* 0.6, CHCl<sub>3</sub>), *ee* 29%. **FTIR**  $\nu_{max}$  (KBr)/cm<sup>-1</sup> 3394, 2924, 1722, 1653, 1608, 1528, 1455, 1218, 928, 772, 699. **<sup>1</sup>H NMR** (CDCl<sub>3</sub>, 400 MHz):  $\delta$  7.77 (d, 1H, *J* = 7.6 Hz), 7.65 (t, 1H, *J* = 7.5 Hz), 7.47 (d, 1H, *J* = 7.6 Hz), 7.40 (t, 1H, *J* = 7.5 Hz), 7.35-7.29 (m, 2H), 7.27-7.25 (m, 3H), 7.18 (bs, 1H), 4.41 (d, 2H, *J* = 5.9 Hz), 3.83 (bs, 1H), 3.77 (d, 1H, *J* = 16.8 Hz), 3.13 (d, 1H, *J* = 16.8 Hz). **<sup>13</sup>C NMR** (CDCl<sub>3</sub>, 100 MHz):  $\delta$  203.2, 170.3, 153.0, 137.6, 136.3, 133.8, 128.7, 128.1, 127.7, 127.6, 126.4, 125.2, 82.2, 43.4, 40.7 **MS** (ESI *m/z*) 282.00 [MH<sup>+</sup>, 10%], 304.05 [MNa<sup>+</sup>, 100%]. HPLC analysis with Chiralcel ODH column, 80:20 *n*-hexane:2-propanol, 1 mL/min, detection at 254 nm; minor enantiomer *t<sub>R</sub>* = 10.1 min, major enantiomer *t<sub>R</sub>* = 12.1 min.

### X-Ray Data for the Absolute Configuration Assignment of Compound **3b**

X-ray diffraction quality single crystals of **3b** were obtained by slow evaporation of a solution of **3b** in *n*-pentane/CHCl<sub>3</sub> mixture performed at room temperature.

A suitable crystal of **3b** was selected and glued on a glass fiber and measured at room temperature with a Rigaku AFC7S diffractometer equipped with a Mercury CCD detector using MoK $\alpha$  radiation. Data reduction was performed with the crystallographic package CrystalClear.<sup>5</sup> Data have been corrected for Lorentz, polarization and absorption. The structures were solved by direct methods using the program SIR2002<sup>6</sup> and refined by means of full matrix least-squares based on  $F^2$  using the program SHELXL97.<sup>7</sup>

All non-hydrogen atoms were refined anisotropically, hydrogen atoms were positioned geometrically and included in structure factors calculations but not refined.

A total of 190 refinable parameters were finally considered, final disagreement indices are  $R = 0.079$  (2339 reflections  $F^2 > 2\sigma F^2$ ),  $wR2 = 0.199$  (all 3466 independent reflections).

Flack parameter is 0.018(19).

ORTEP plot is obtained by means of the program ORTEP32.<sup>8</sup>

#### Crystal data:

C<sub>16</sub>H<sub>12</sub>BrNO<sub>3</sub>, orthorhombic, space group  $P2_12_12_1$ ,  $Z = 4$ ,  $a = 9.801(3)\text{Å}$ ,  $b = 10.969(3)\text{Å}$ ,  $c = 14.070(4)\text{Å}$ ,  $V = 1512.6(8)\text{Å}^3$ ,  $D_x = 1.520\text{ g cm}^{-3}$ ,  $\mu_{calc} = 2.73\text{ mm}^{-1}$ .

---

<sup>5</sup> CrystalClear, Crystal Structure Analysis Package, Rigaku-Molecular Structure Corp.

<sup>6</sup> M. C. Burla, M. Camalli, B. Carrozzini, G. Cascarano, C. Giacovazzo, G. Polidori, R. Spagna *J. Appl. Cryst.* **2001**, *34*, 523.

<sup>7</sup> G. M. Sheldrick, *Acta Cryst.* **2008**, *A64*, 112.

<sup>8</sup> L. J. Farrugia, *J. Appl. Cryst.* **1997**, *30*, 565



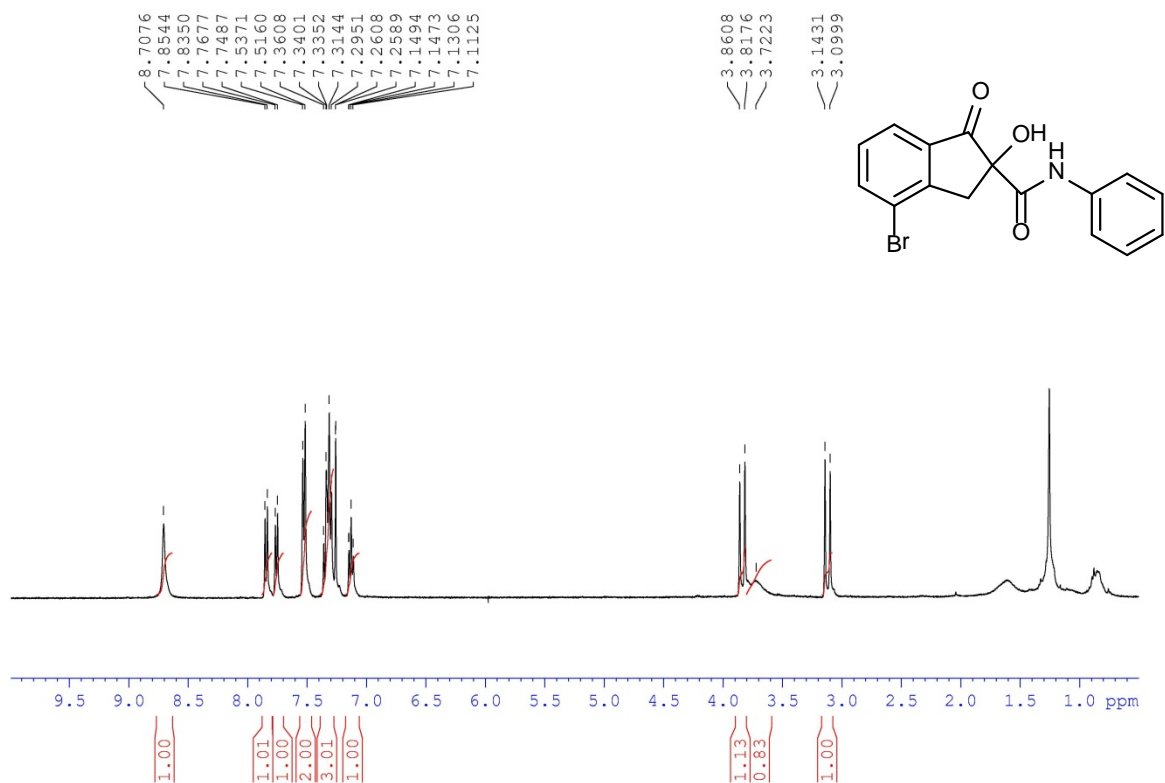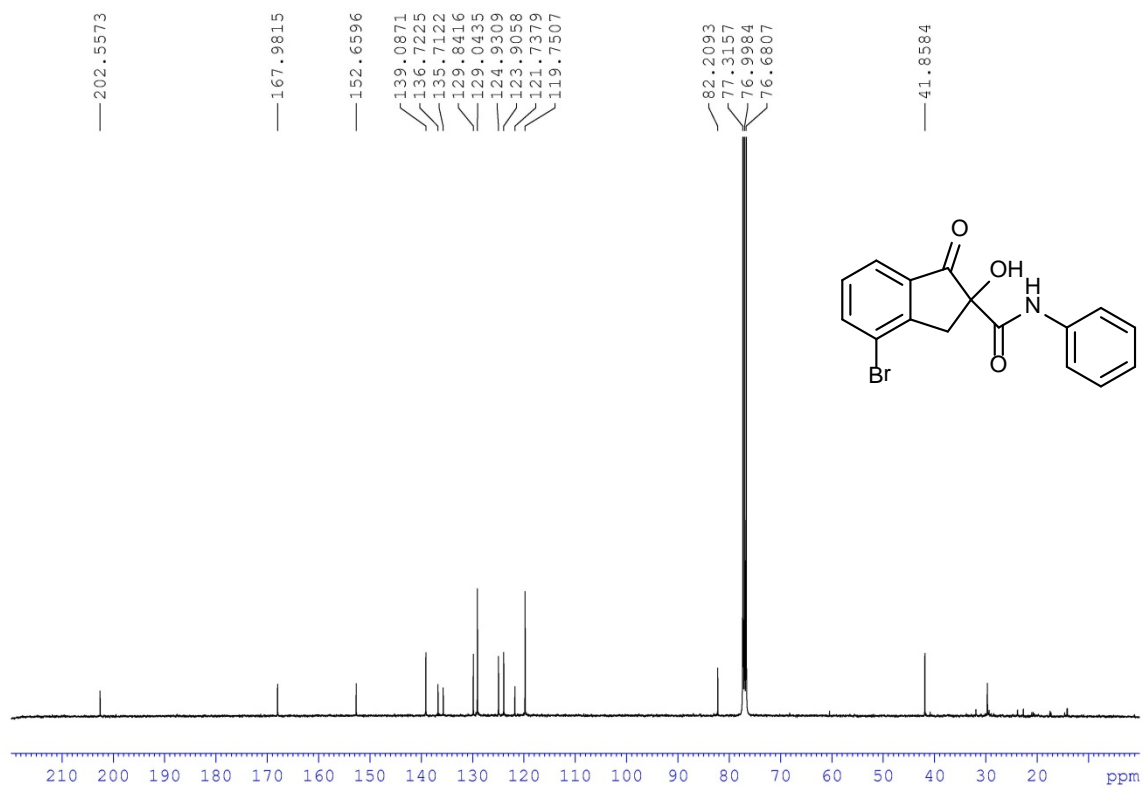

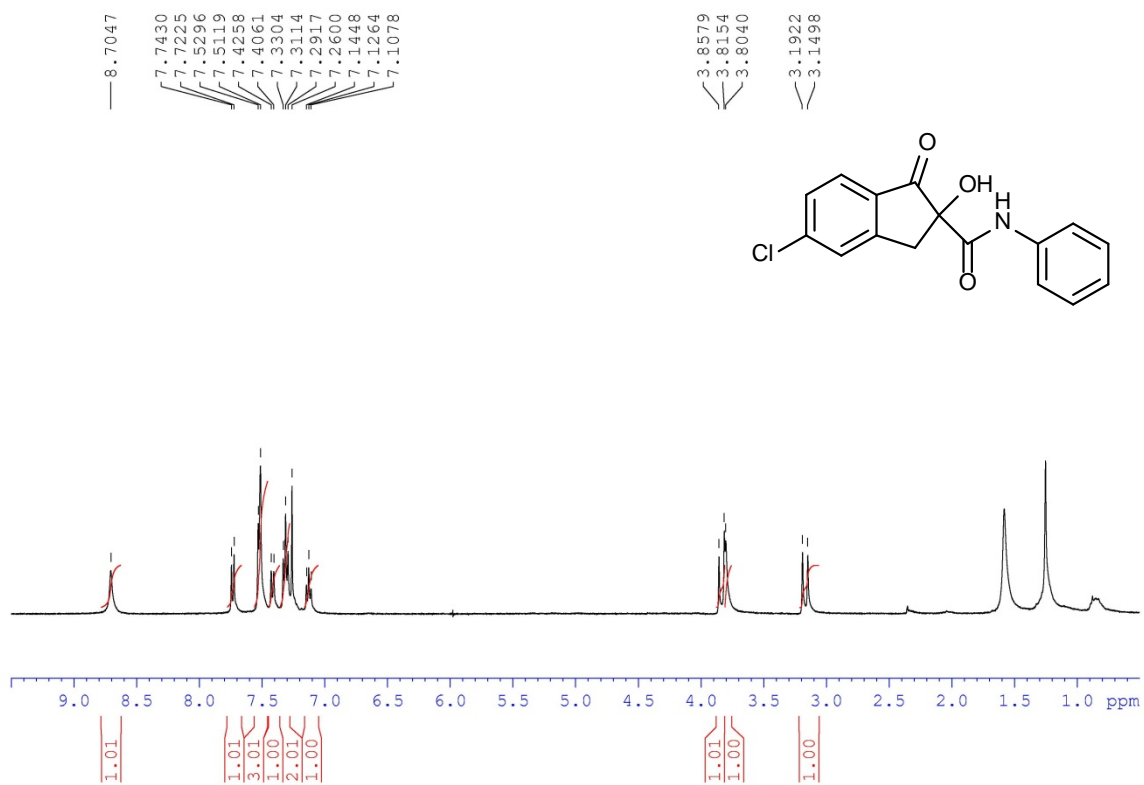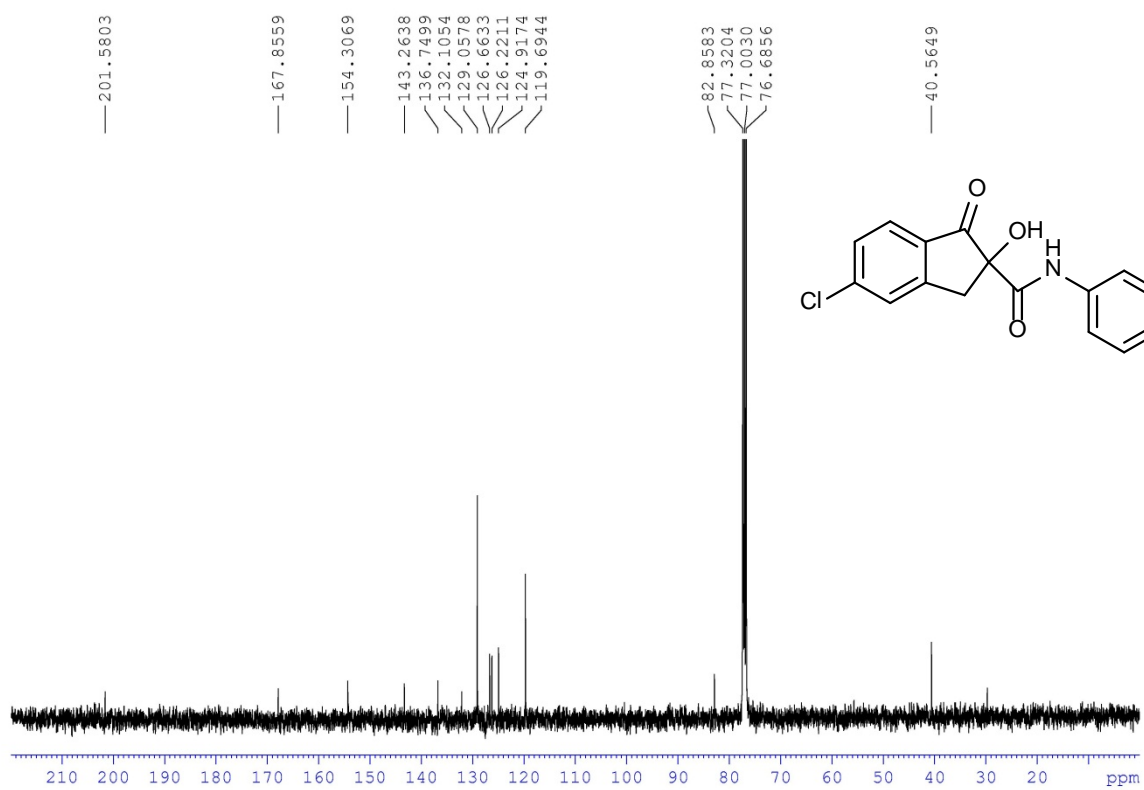

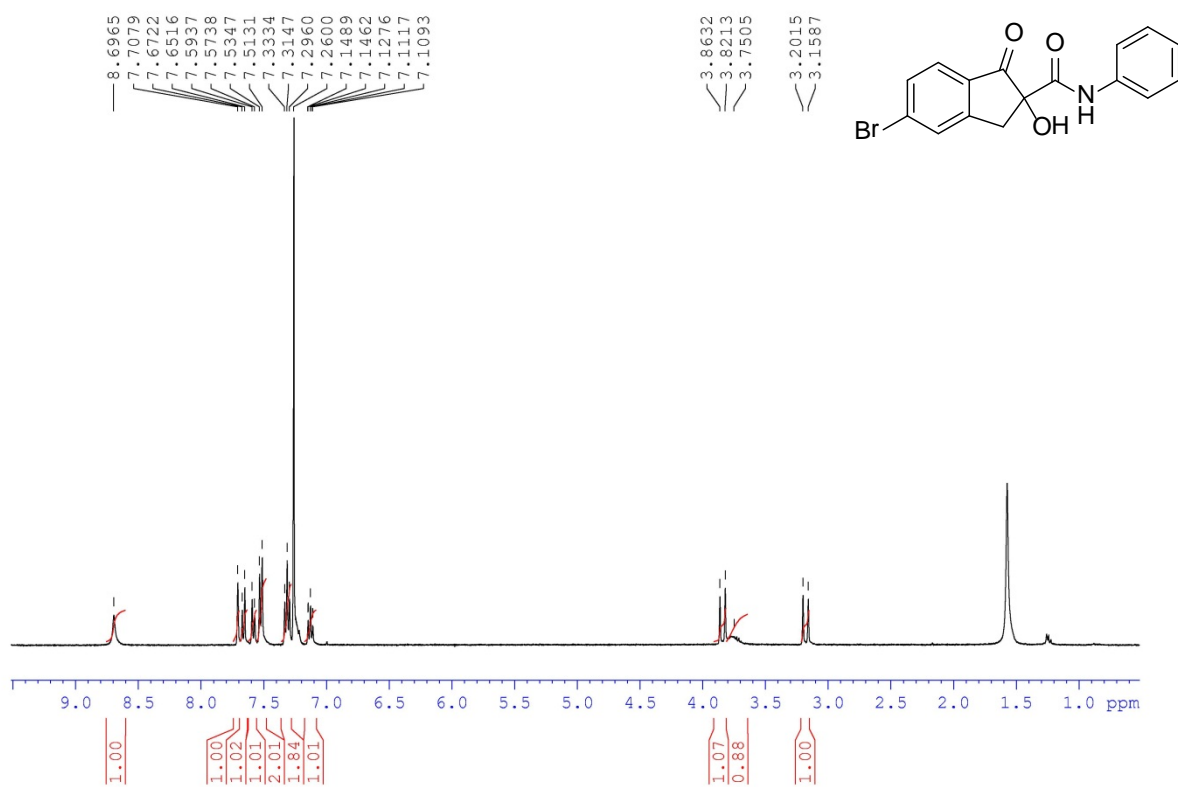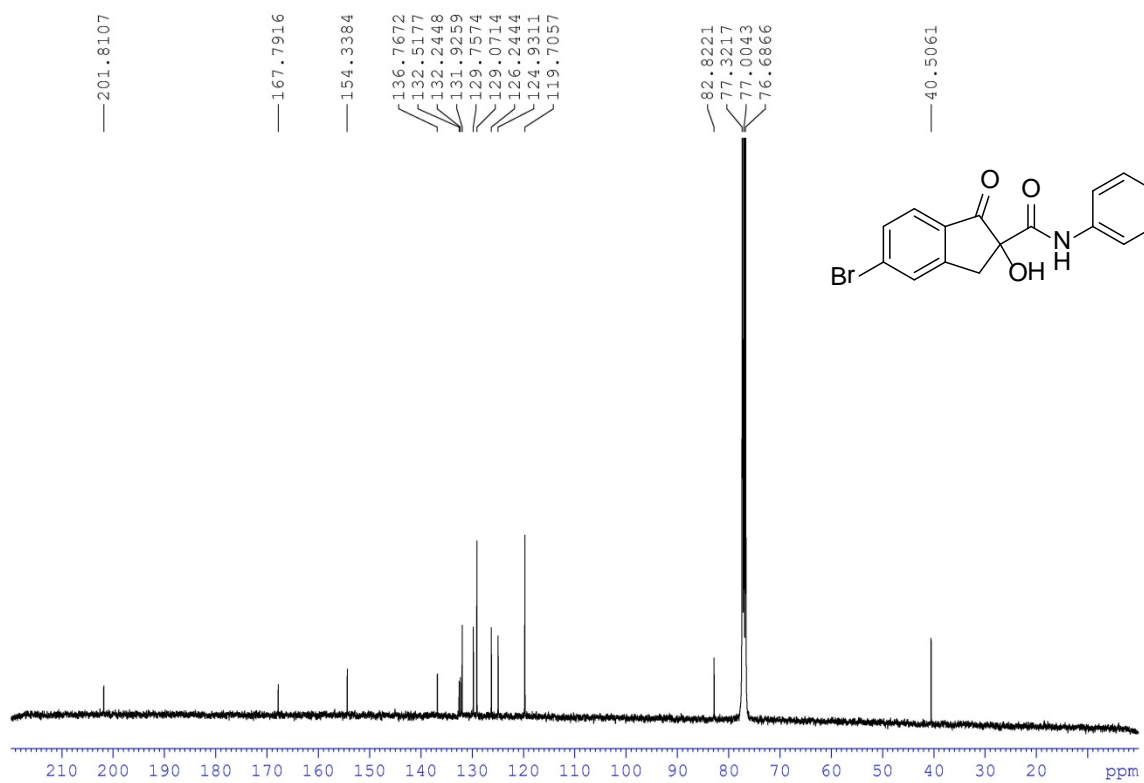

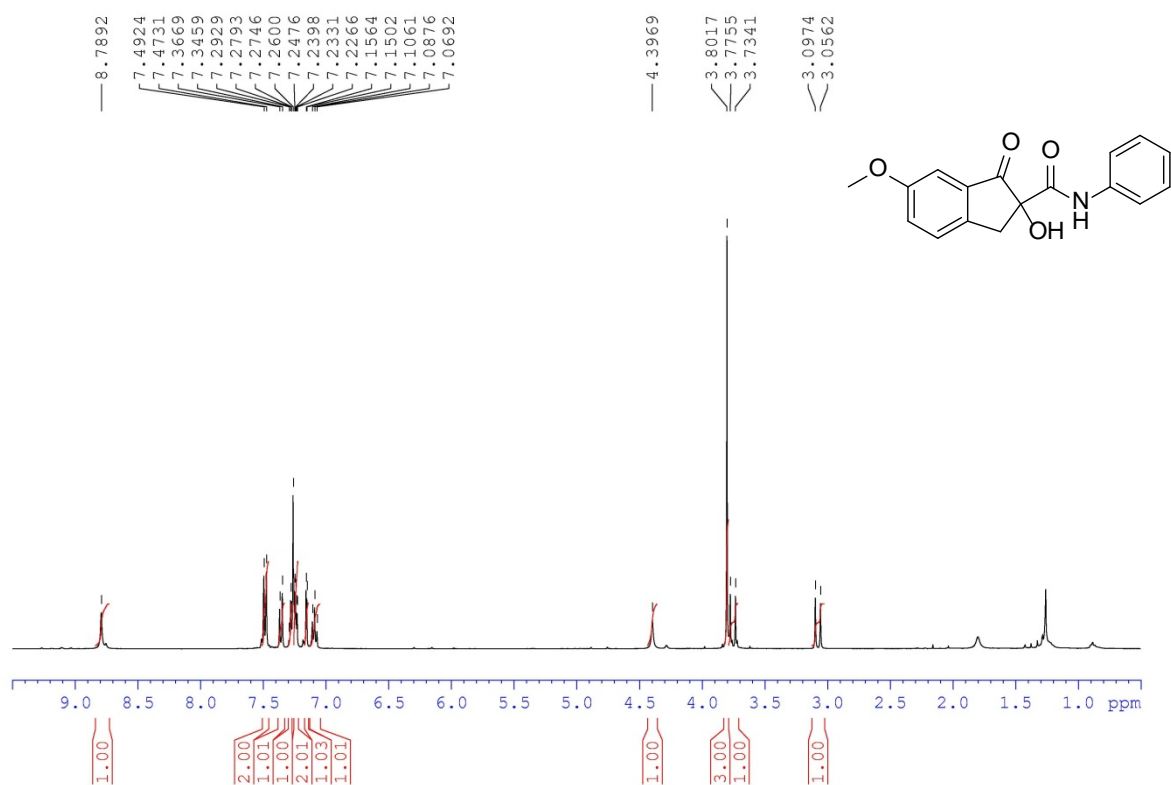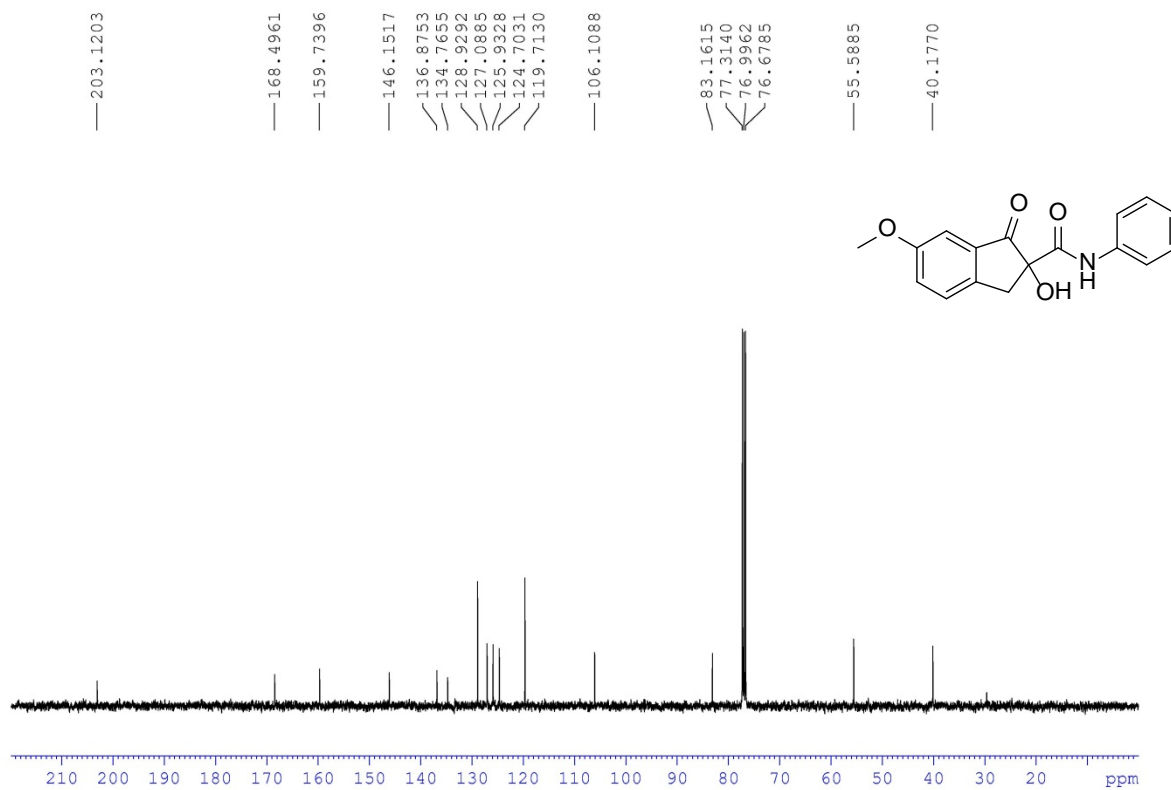



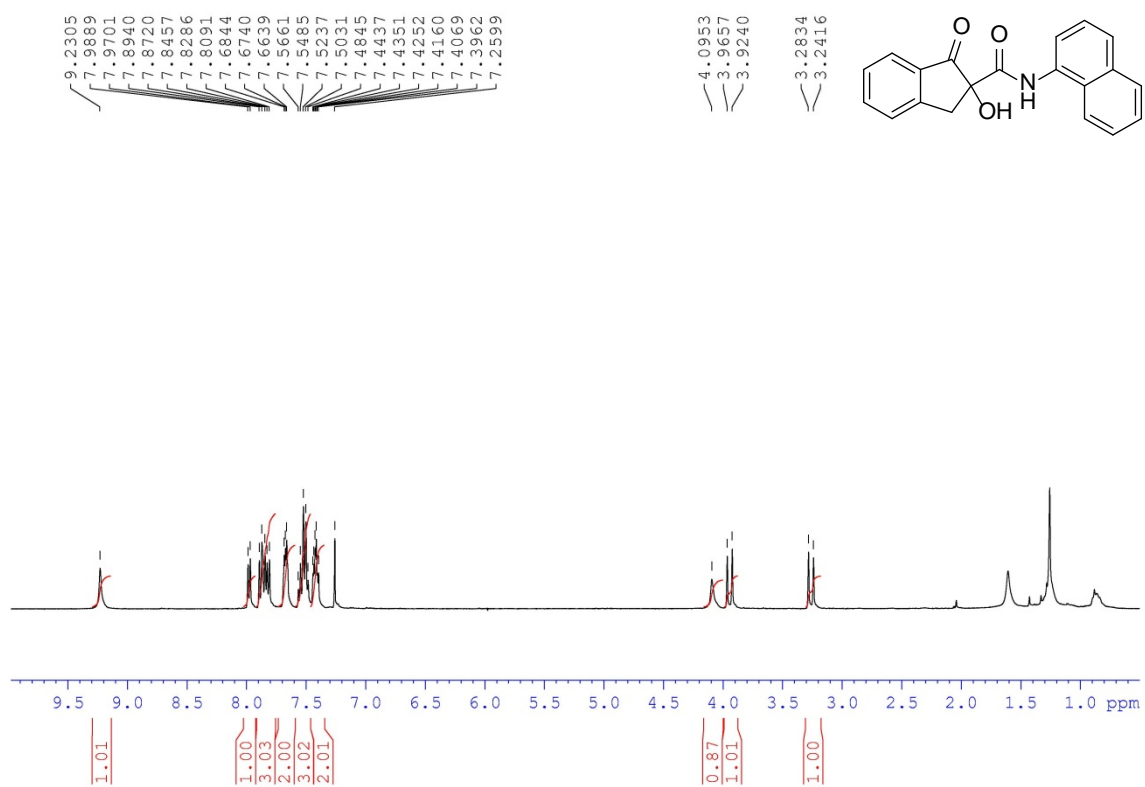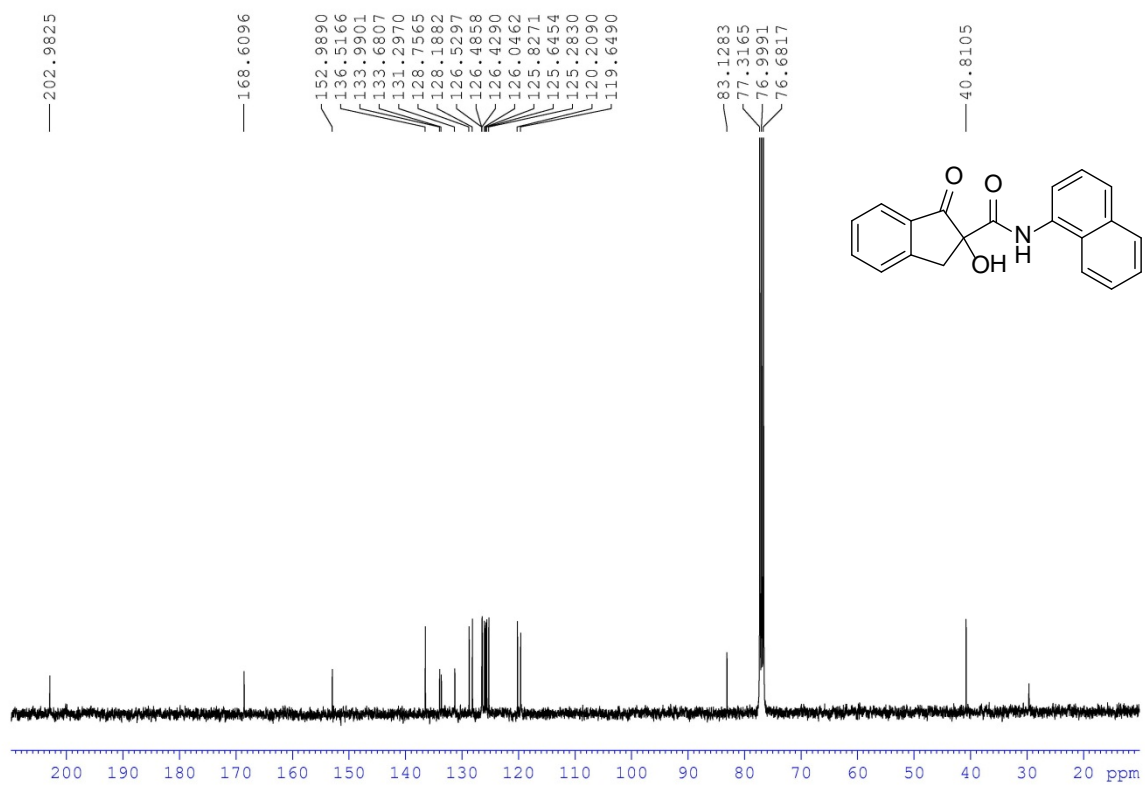

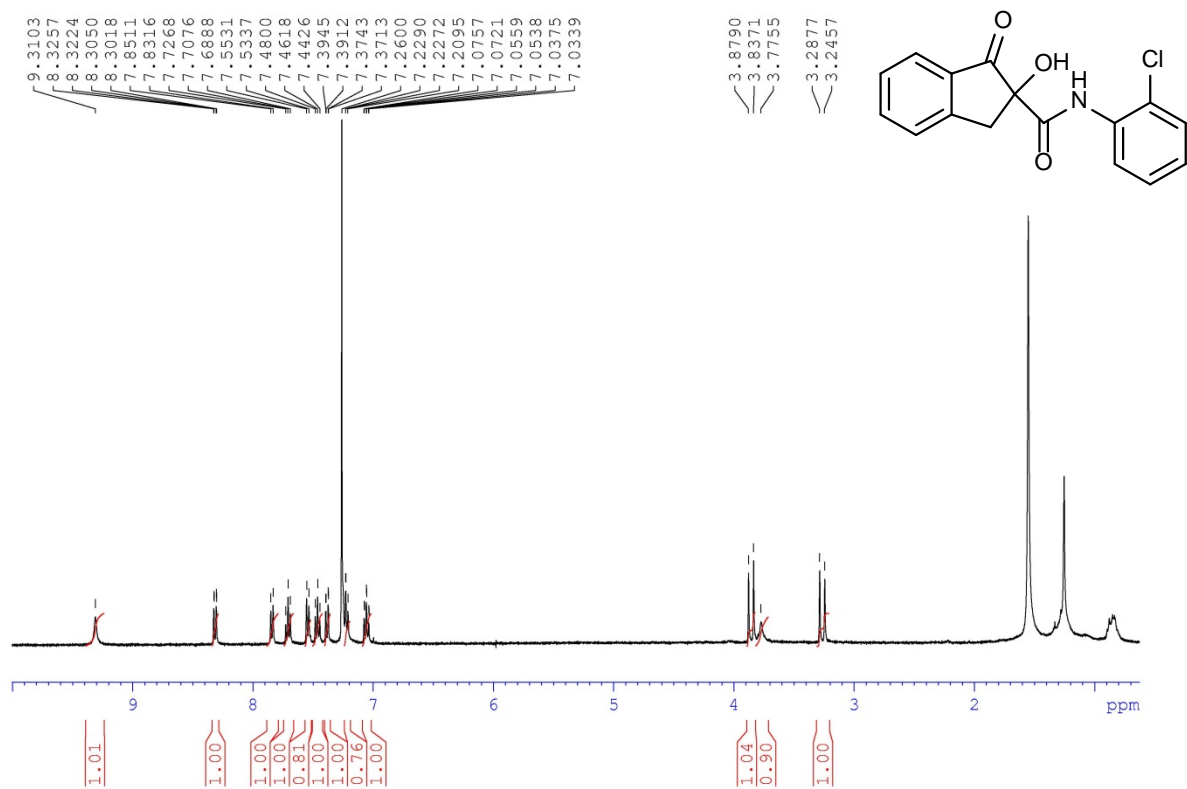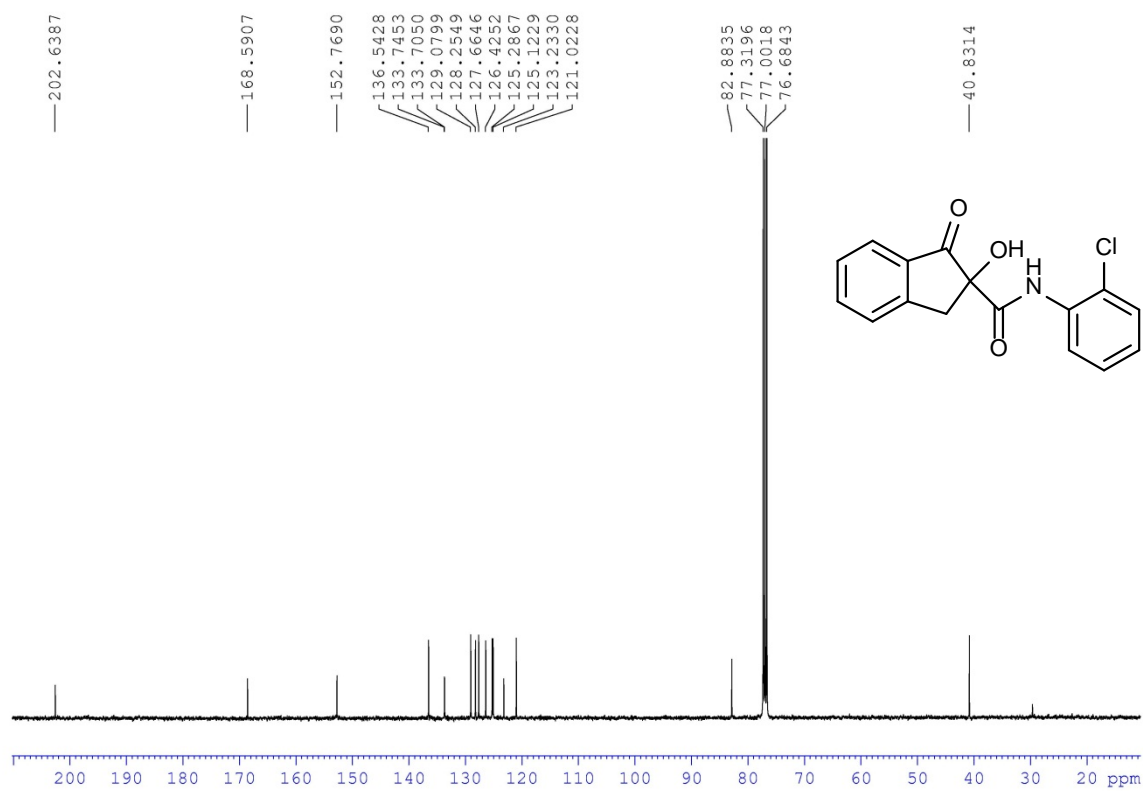

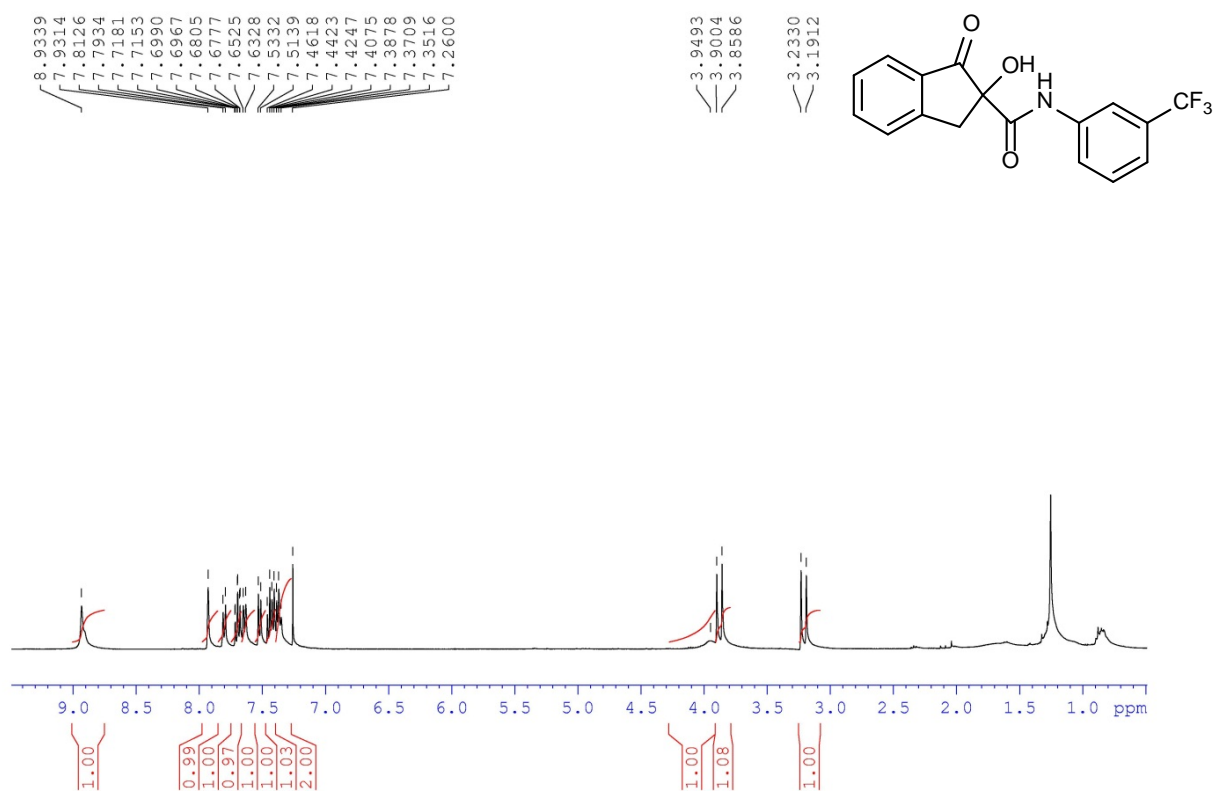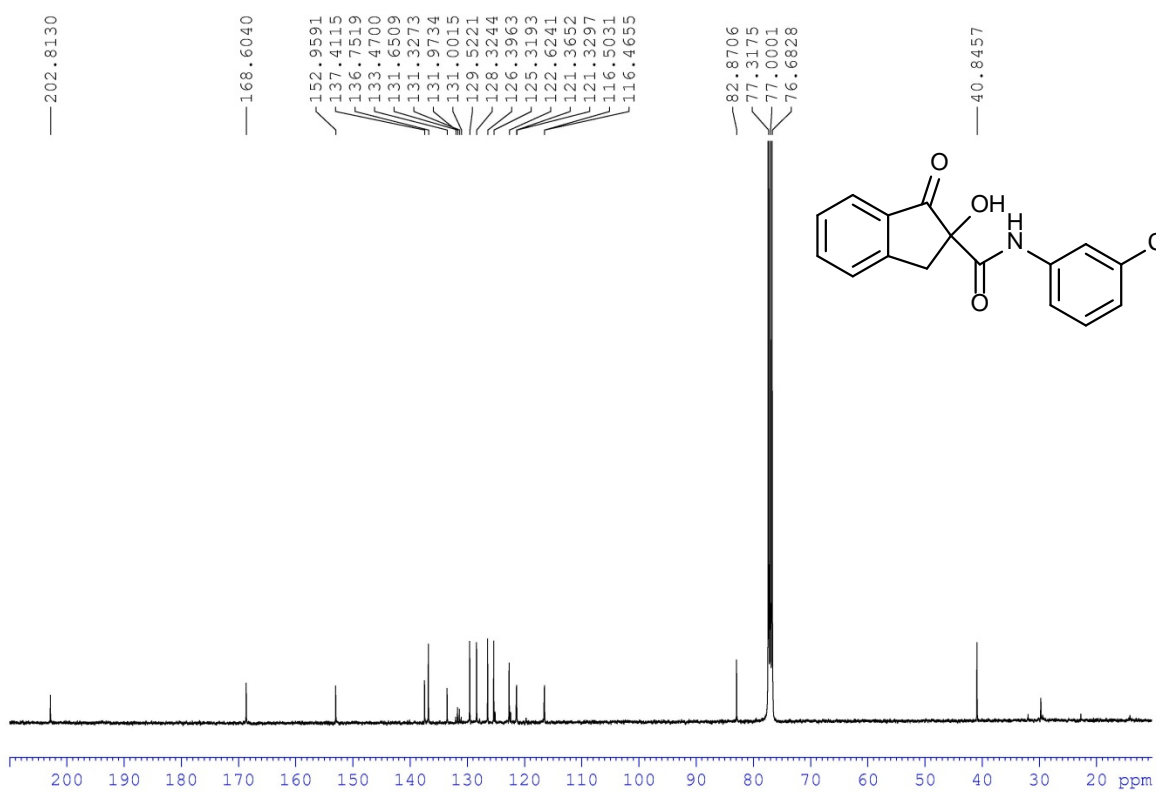

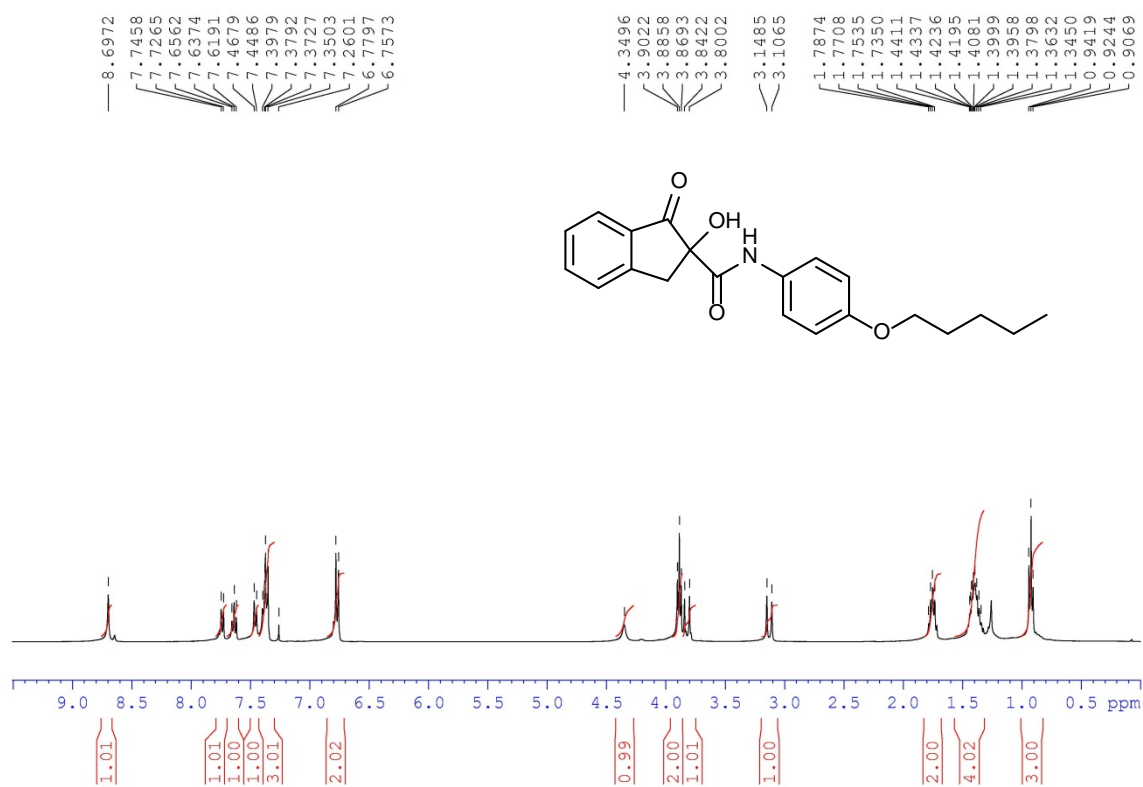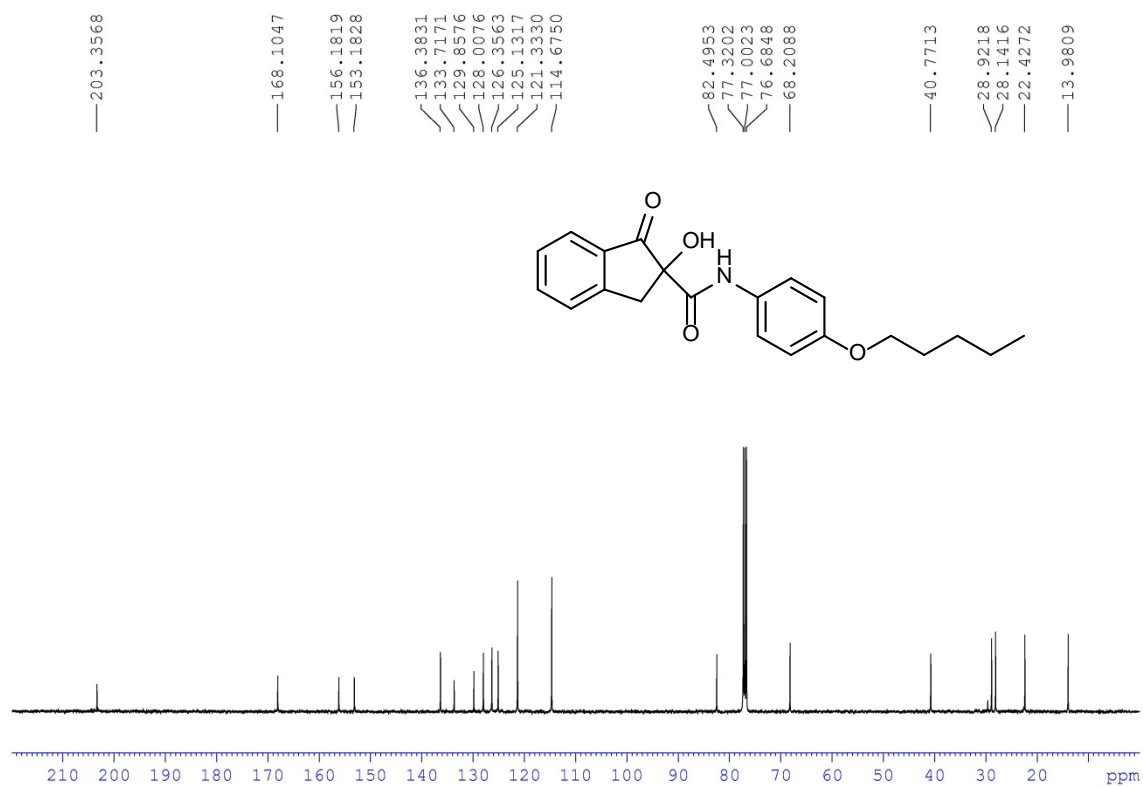

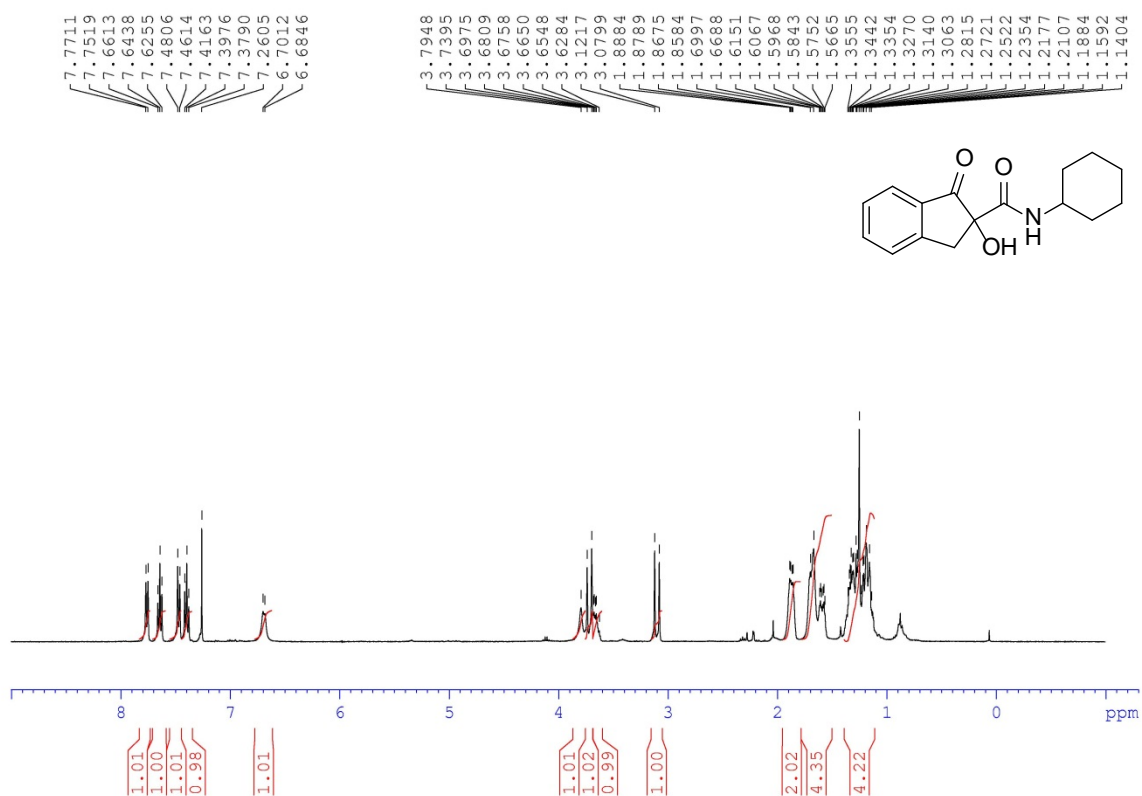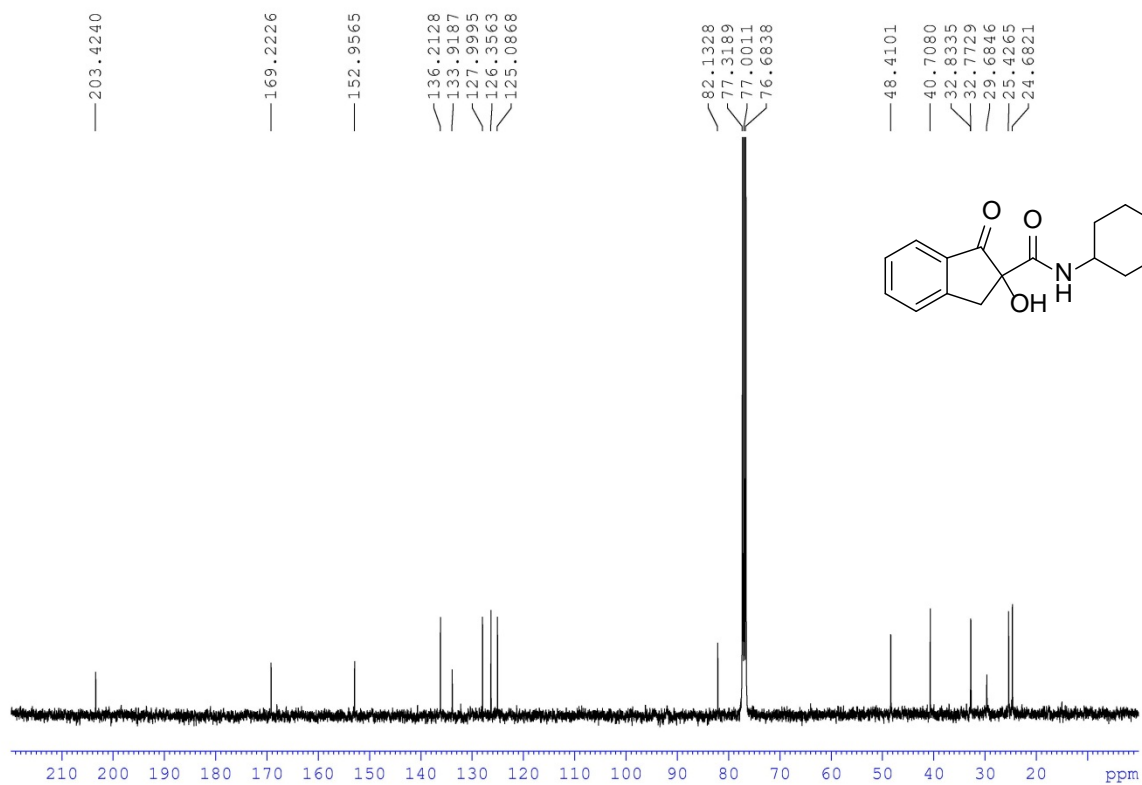

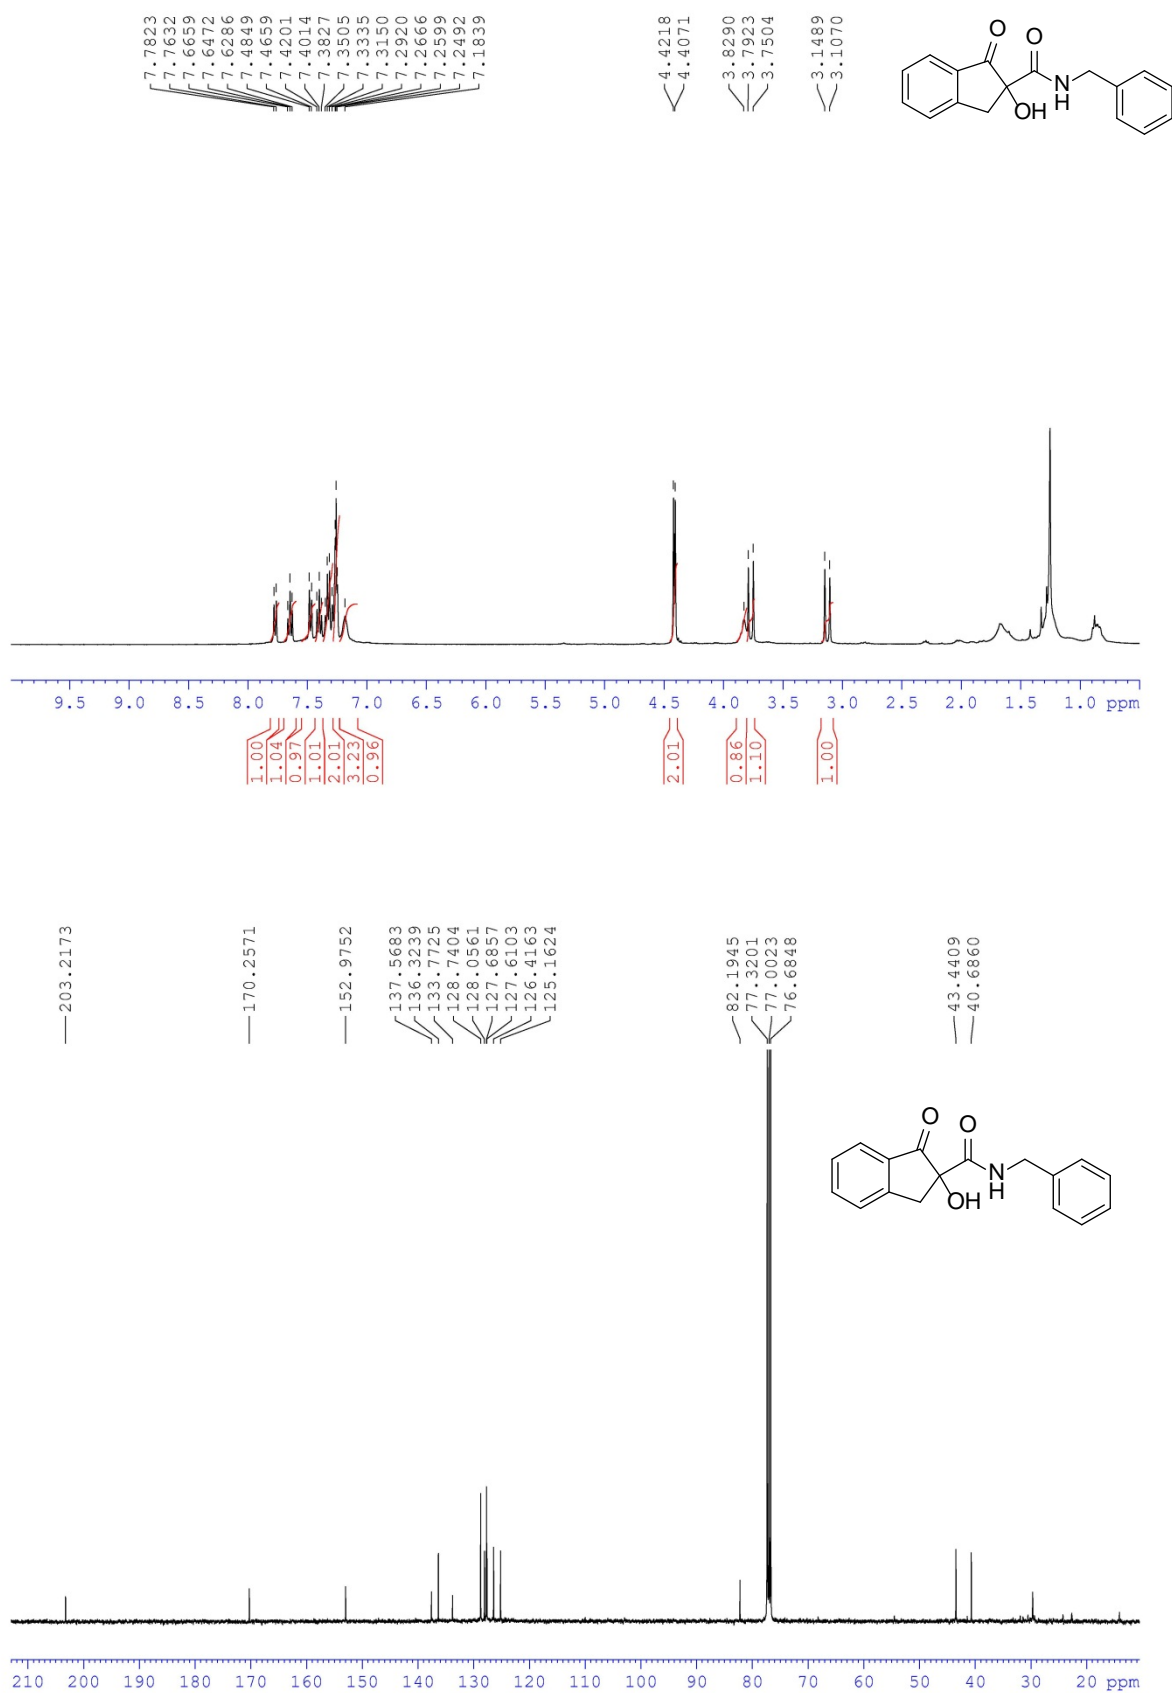

### HPLC Chromatograms

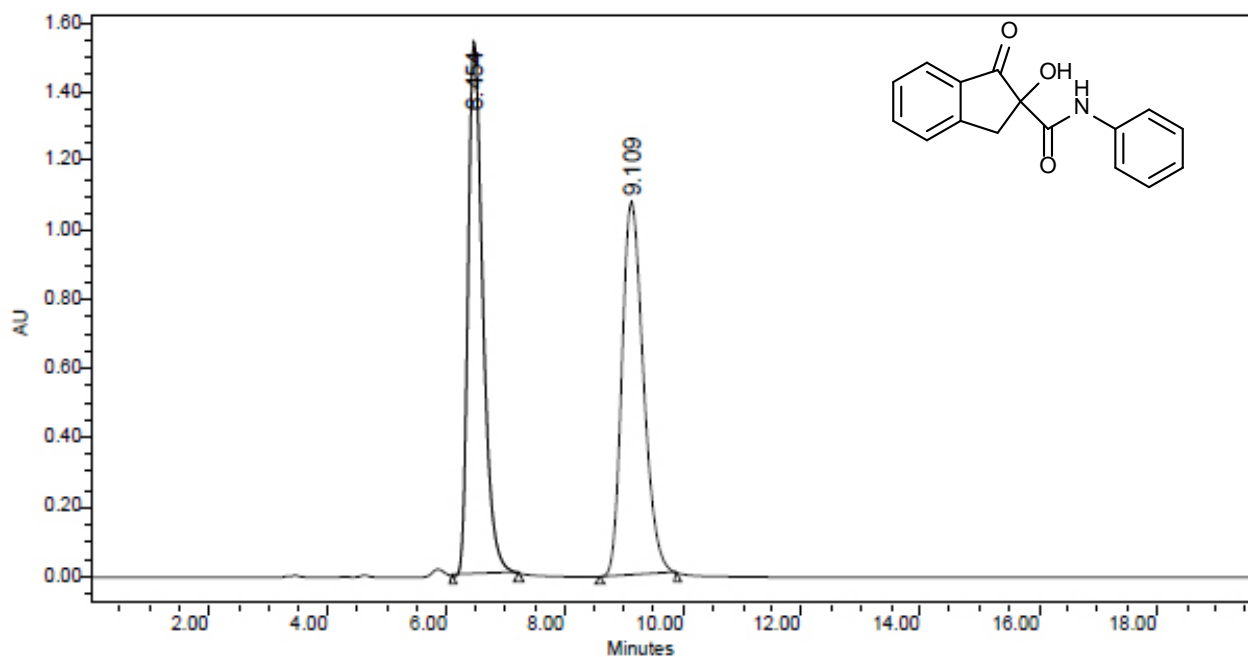

|   | RT (min) | Area (V*sec) | % Area | Height (V) | % Height |
|---|----------|--------------|--------|------------|----------|
| 1 | 6.454    | 26864286     | 49.62  | 1542077    | 58.83    |
| 2 | 9.109    | 27277915     | 50.38  | 1079291    | 41.17    |

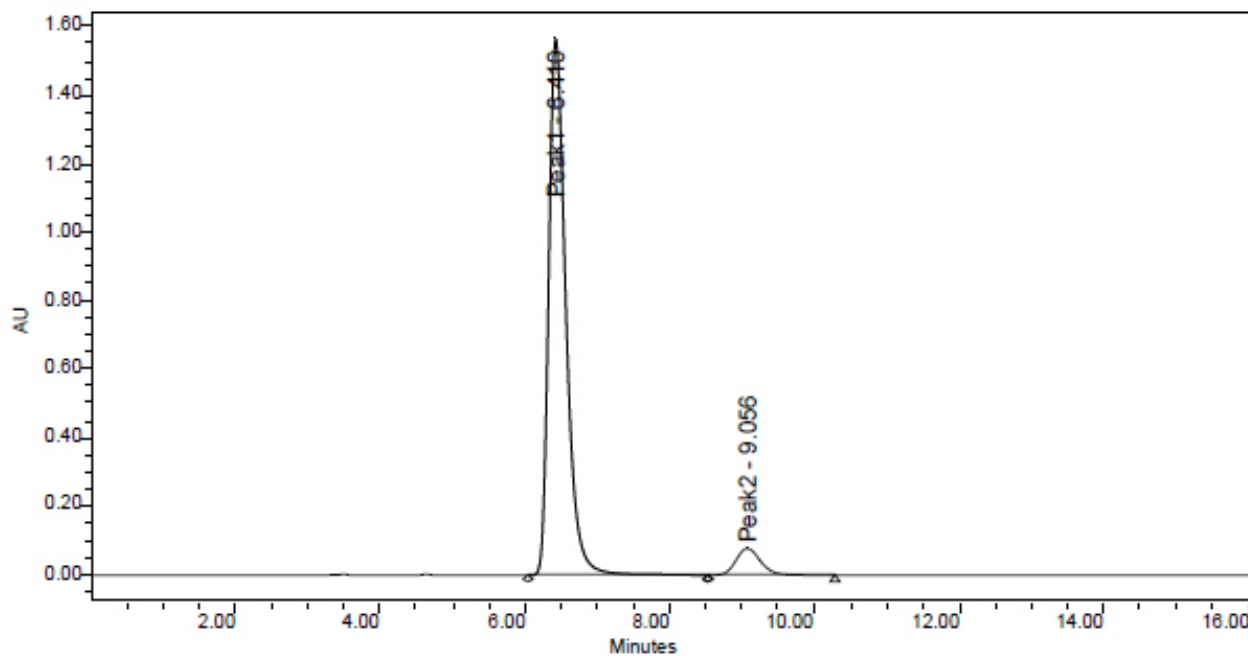

|   | Peak Name | RT (min) | Area (V*sec) | % Area | Height (V) | % Height |
|---|-----------|----------|--------------|--------|------------|----------|
| 1 | Peak1     | 6.410    | 25823329     | 93.28  | 1568291    | 95.23    |
| 2 | Peak2     | 9.056    | 1859265      | 6.72   | 78469      | 4.77     |

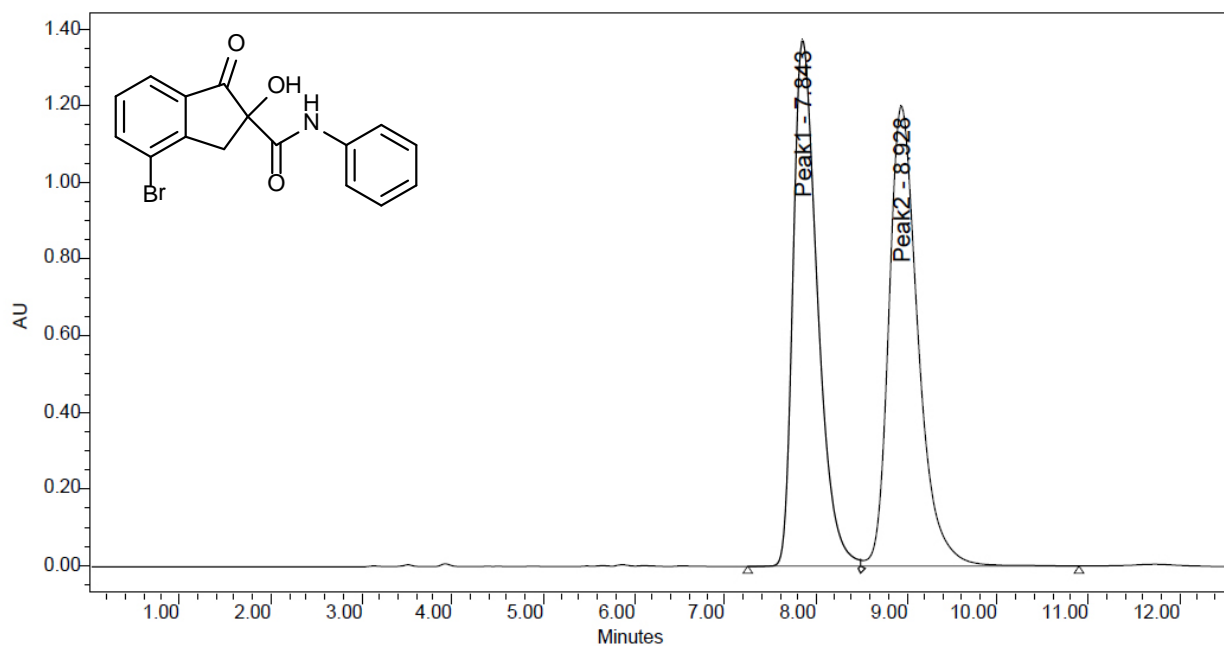

| Peak Name | RT (min) | Area (UV*sec) | % Area | Height (UV) | % Height |
|-----------|----------|---------------|--------|-------------|----------|
| 1 Peak1   | 7.843    | 25570330      | 48.78  | 1372284     | 53.34    |
| 2 Peak2   | 8.928    | 26847304      | 51.22  | 1200305     | 46.66    |

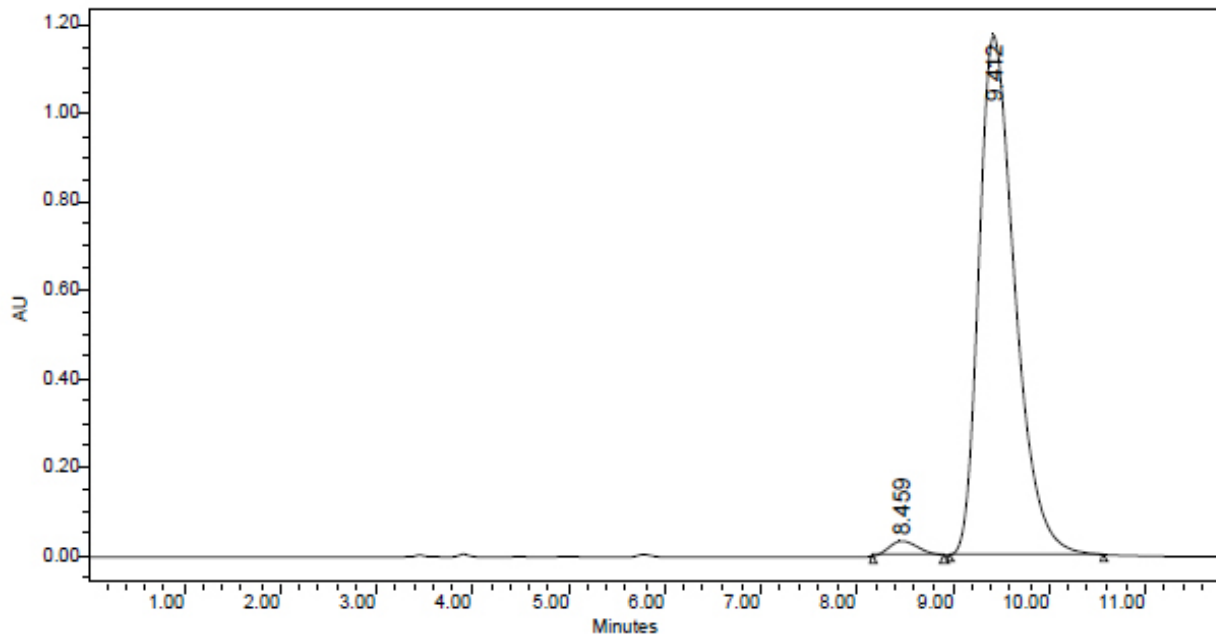

| RT (min) | Area (UV*sec) | % Area | Height (UV) | % Height |
|----------|---------------|--------|-------------|----------|
| 1 8.459  | 693274        | 2.23   | 33195       | 2.75     |
| 2 9.412  | 30462791      | 97.77  | 1172708     | 97.25    |



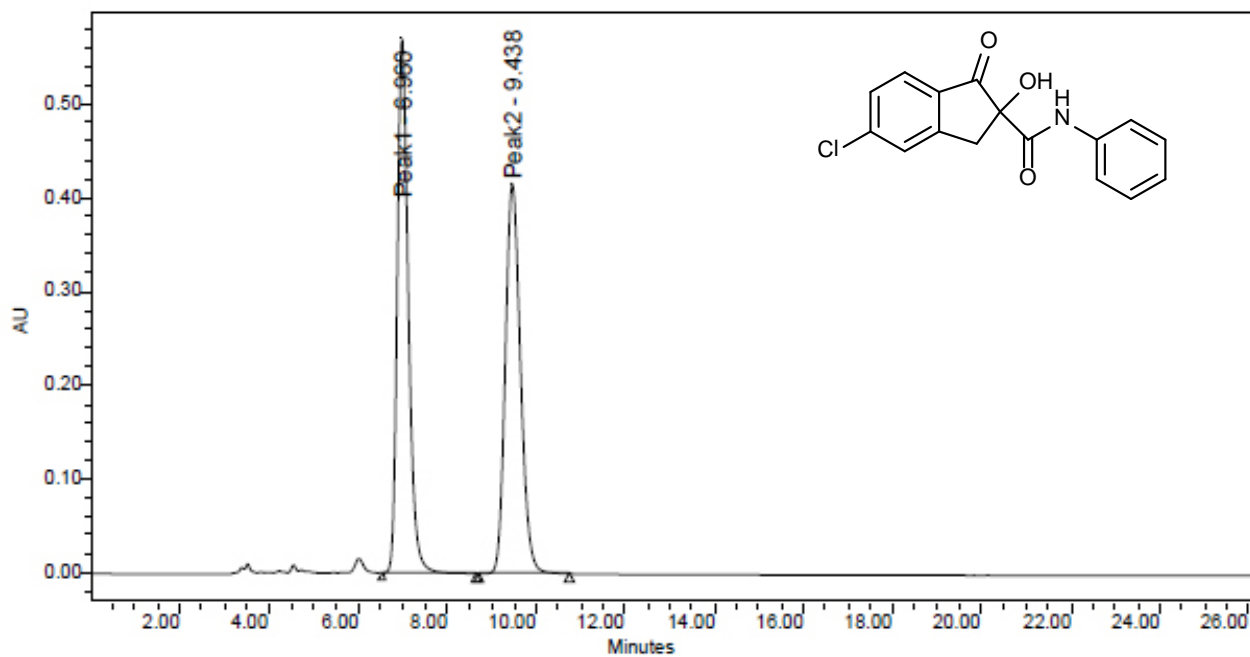

|   | Peak Name | RT (min) | Area (V*sec) | % Area | Height (V) | % Height |
|---|-----------|----------|--------------|--------|------------|----------|
| 1 | Peak1     | 6.960    | 9858274      | 50.04  | 569670     | 57.80    |
| 2 | Peak2     | 9.438    | 9841928      | 49.96  | 415973     | 42.20    |

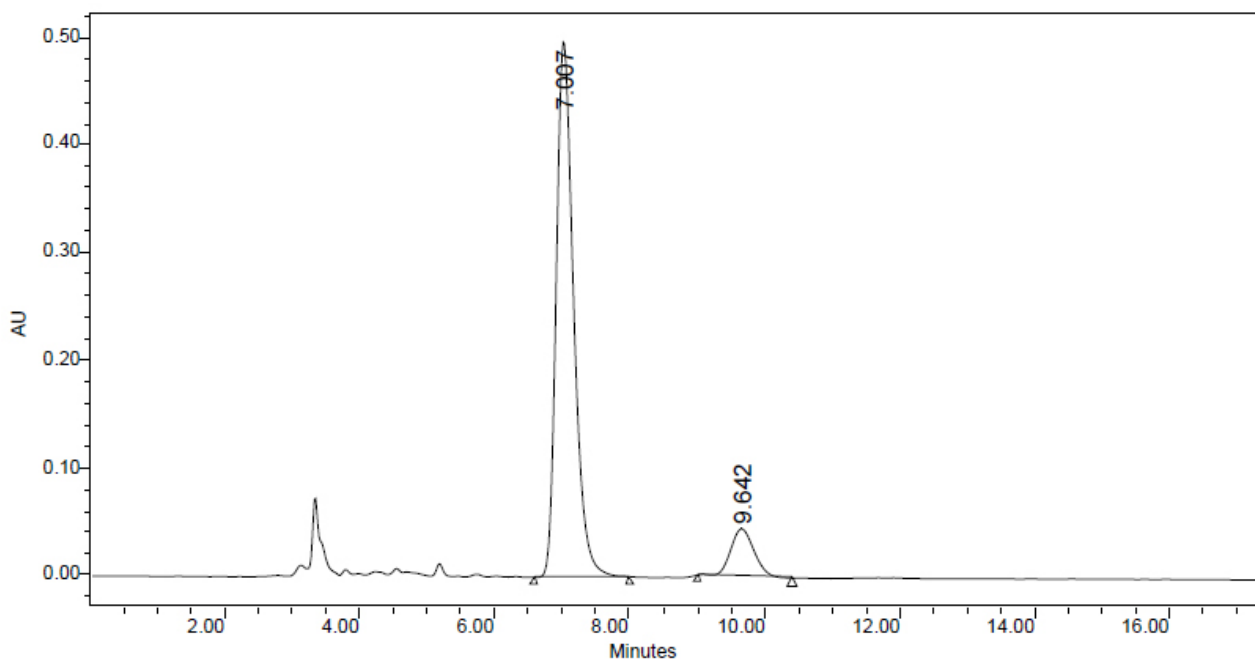

|   | RT (min) | Area (V*sec) | % Area | Height (V) | % Height |
|---|----------|--------------|--------|------------|----------|
| 1 | 7.007    | 8885098      | 89.35  | 498217     | 91.85    |
| 2 | 9.642    | 1059413      | 10.65  | 44221      | 8.15     |

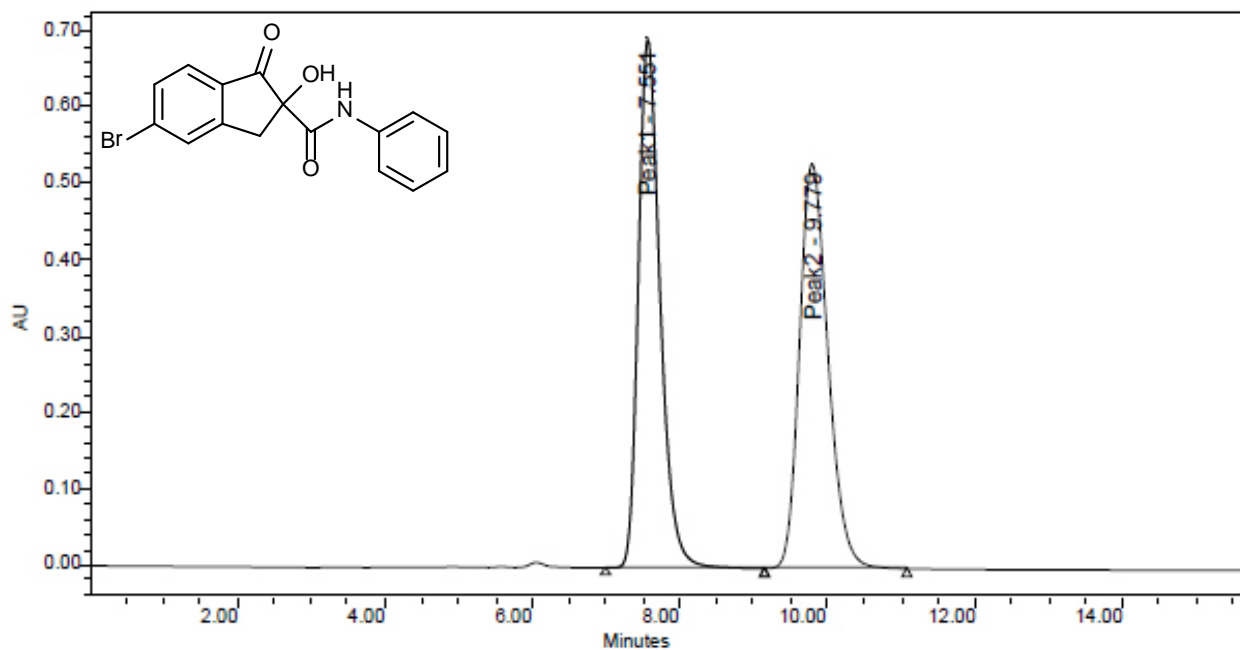

| Peak Name | RT (min) | Area (V*sec) | % Area | Height (V) | % Height |
|-----------|----------|--------------|--------|------------|----------|
| 1 Peak1   | 7.561    | 14210802     | 49.99  | 693117     | 56.63    |
| 2 Peak2   | 9.779    | 14218495     | 50.01  | 530825     | 43.37    |

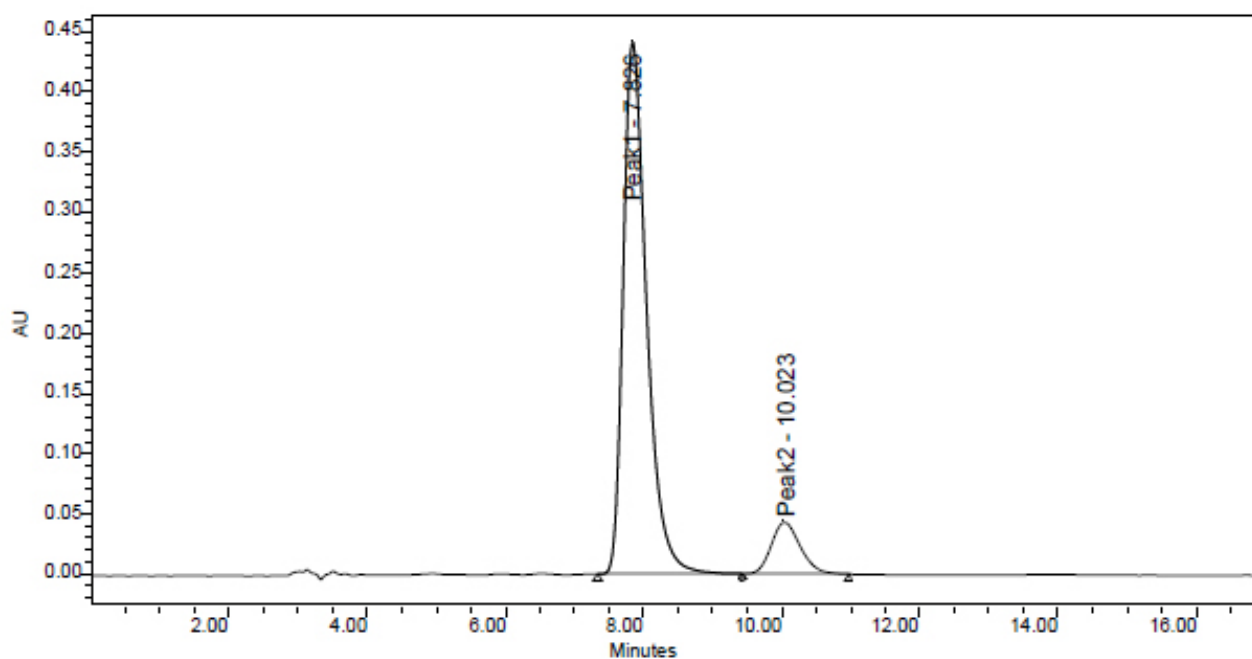

| Peak Name | RT (min) | Area (V*sec) | % Area | Height (V) | % Height |
|-----------|----------|--------------|--------|------------|----------|
| 1 Peak1   | 7.826    | 10391017     | 89.15  | 440630     | 91.13    |
| 2 Peak2   | 10.023   | 1264265      | 10.85  | 42892      | 8.87     |

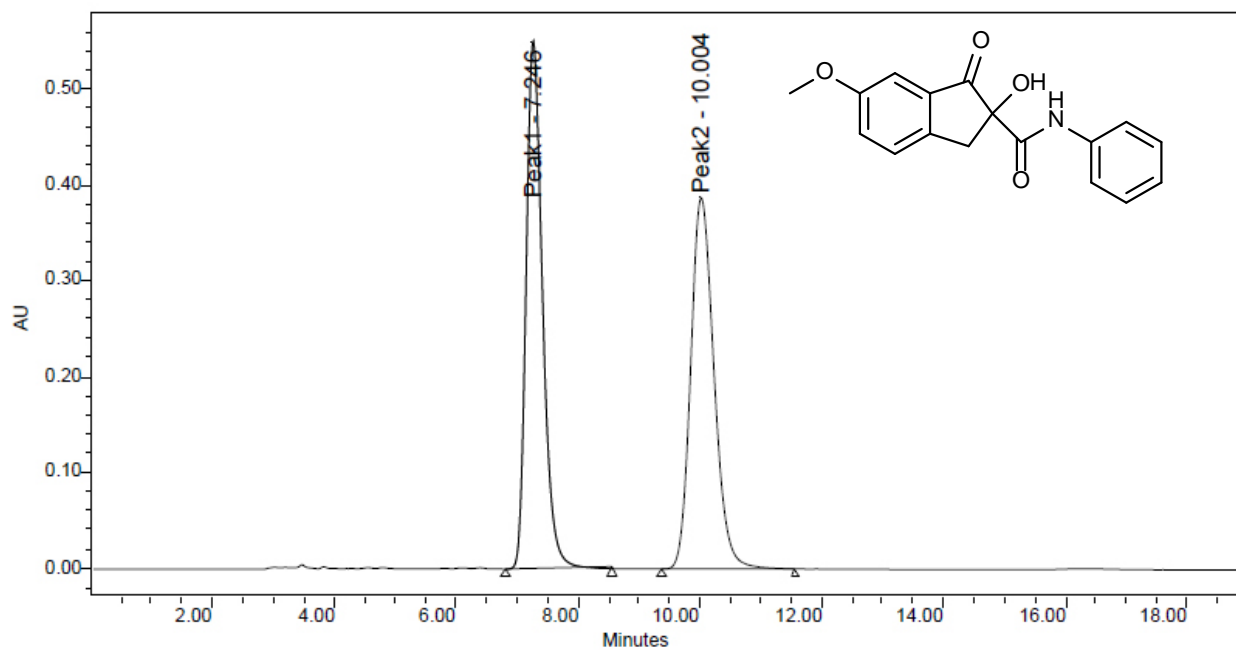

| Peak Name | RT (min) | Area (UV*sec) | % Area | Height (UV) | % Height |
|-----------|----------|---------------|--------|-------------|----------|
| 1 Peak1   | 7.246    | 10274722      | 49.95  | 551154      | 58.74    |
| 2 Peak2   | 10.004   | 10294567      | 50.05  | 387154      | 41.26    |

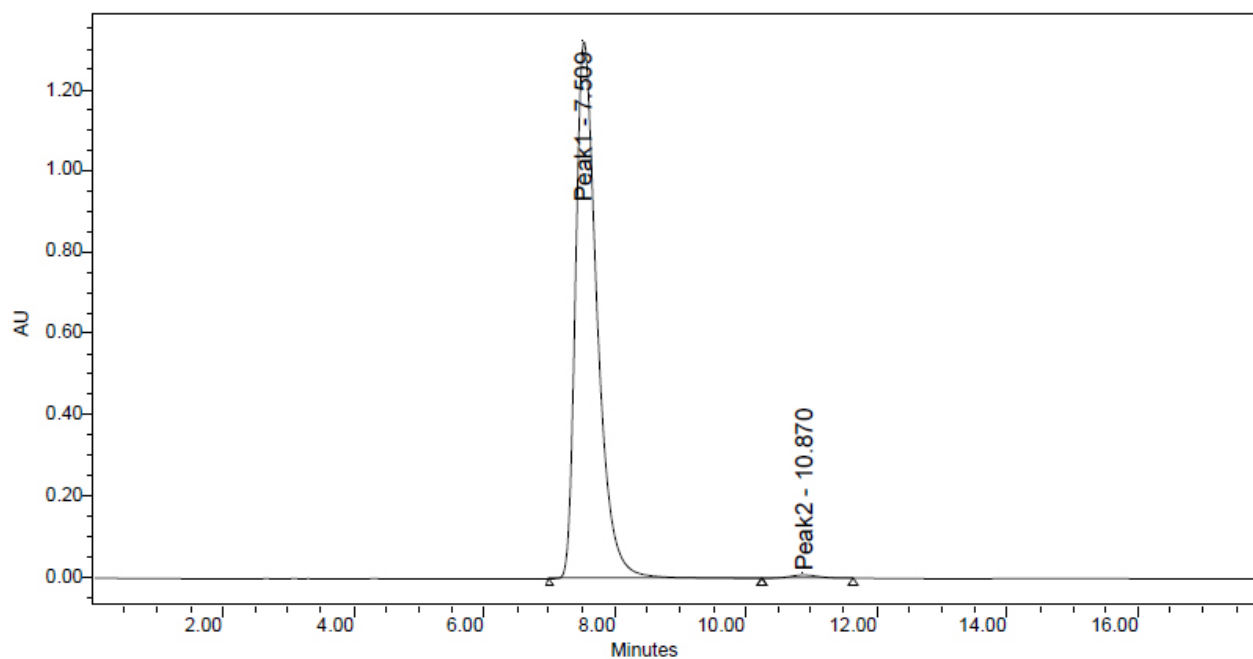

| Peak Name | RT (min) | Area (UV*sec) | % Area | Height (UV) | % Height |
|-----------|----------|---------------|--------|-------------|----------|
| 1 Peak1   | 7.509    | 30242715      | 99.18  | 1322597     | 99.39    |
| 2 Peak2   | 10.870   | 251310        | 0.82   | 8148        | 0.61     |

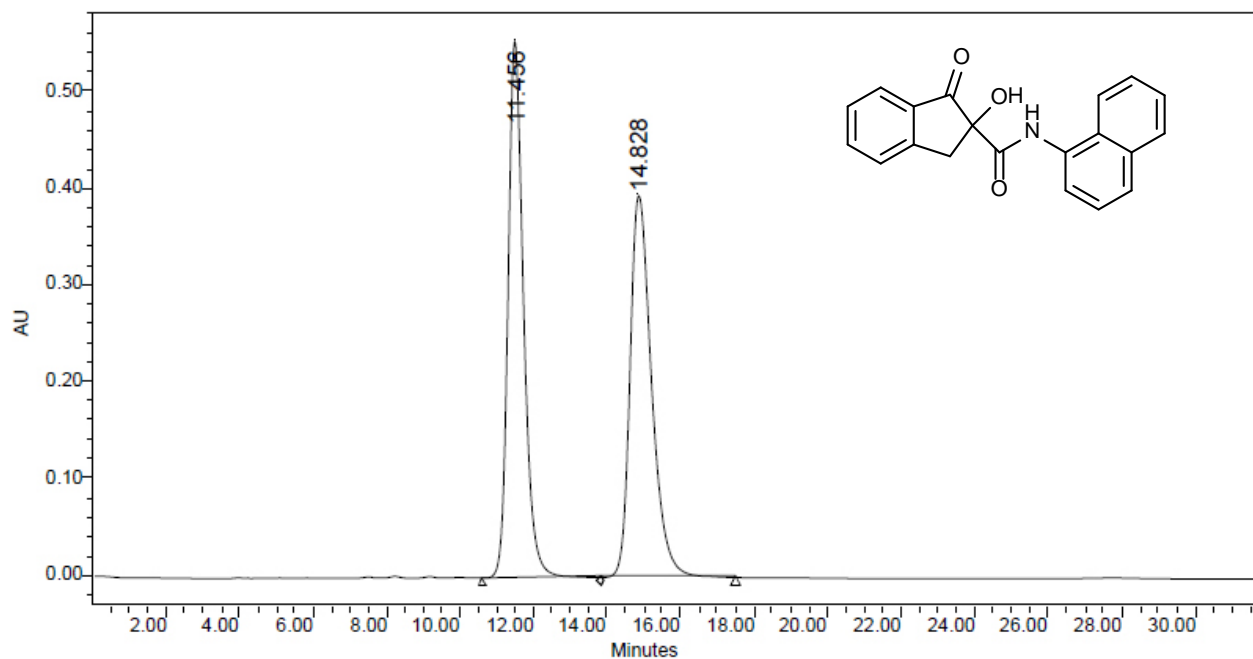

|   | RT (min) | Area (V*sec) | % Area | Height (V) | % Height |
|---|----------|--------------|--------|------------|----------|
| 1 | 11.456   | 16291743     | 50.26  | 554776     | 58.42    |
| 2 | 14.828   | 16123642     | 49.74  | 394874     | 41.58    |

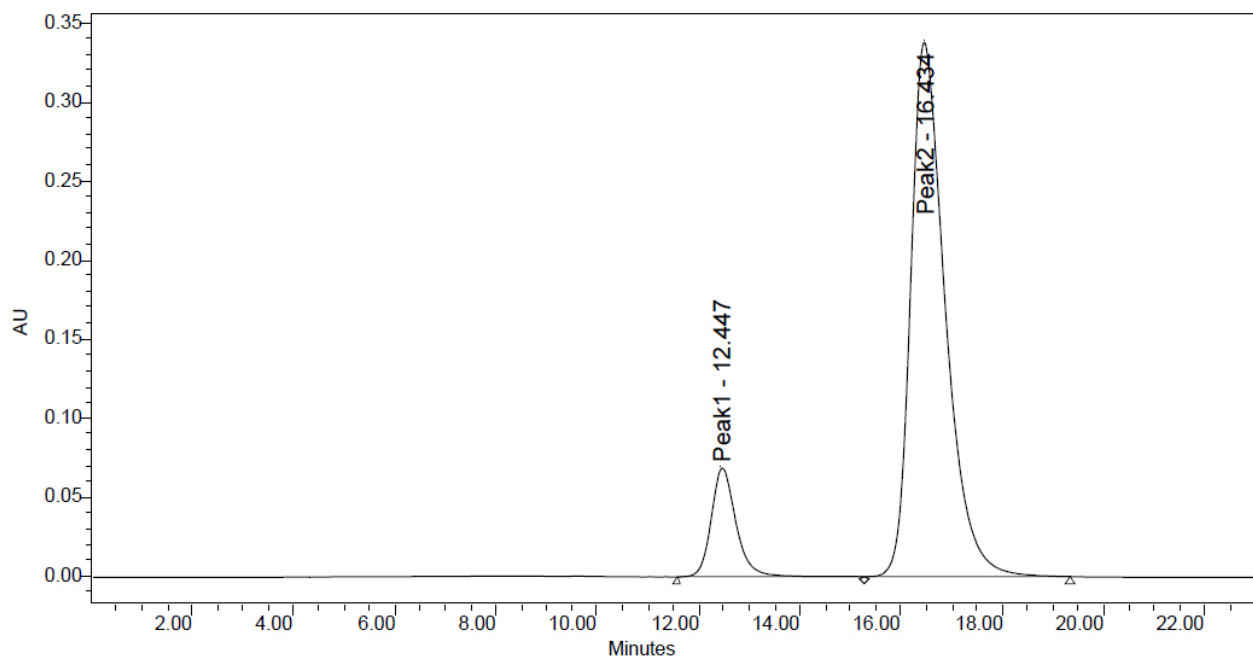

|   | Peak Name | RT (min) | Area (V*sec) | % Area | Height (V) | % Height |
|---|-----------|----------|--------------|--------|------------|----------|
| 1 | Peak1     | 12.447   | 2346994      | 12.77  | 68756      | 16.91    |
| 2 | Peak2     | 16.434   | 16037724     | 87.23  | 337941     | 83.09    |

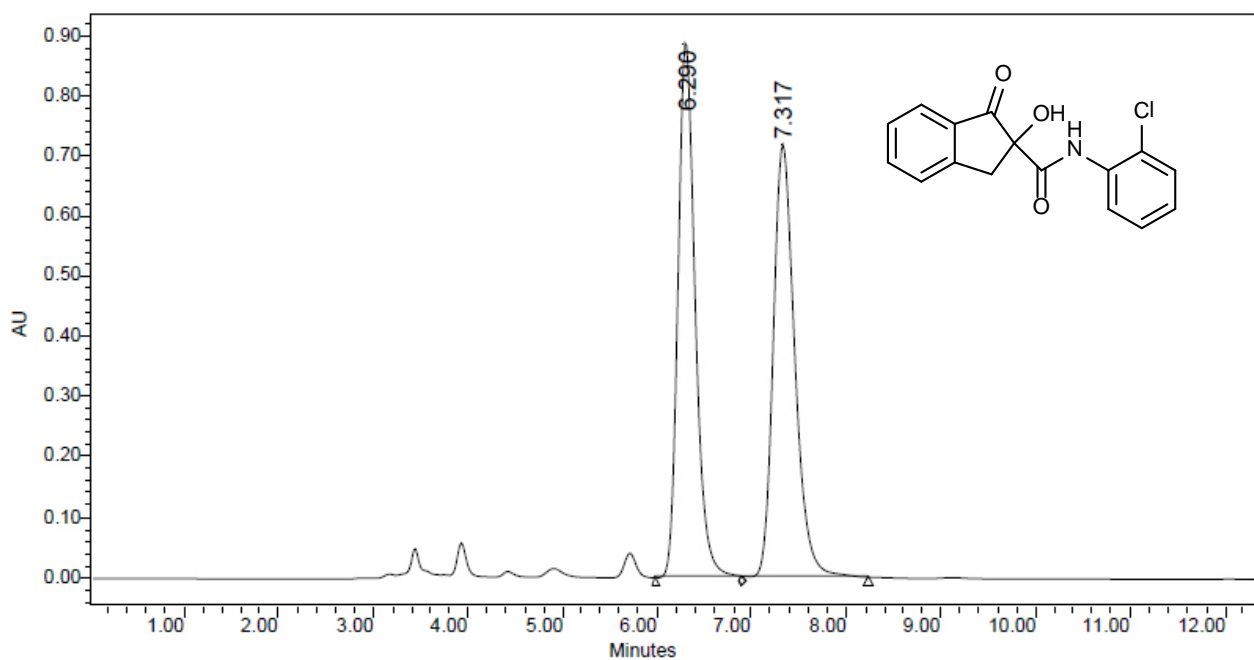

|   | RT (min) | Area (V*sec) | % Area | Height (V) | % Height |
|---|----------|--------------|--------|------------|----------|
| 1 | 6.290    | 11286427     | 49.77  | 892536     | 55.34    |
| 2 | 7.317    | 11390151     | 50.23  | 720289     | 44.66    |

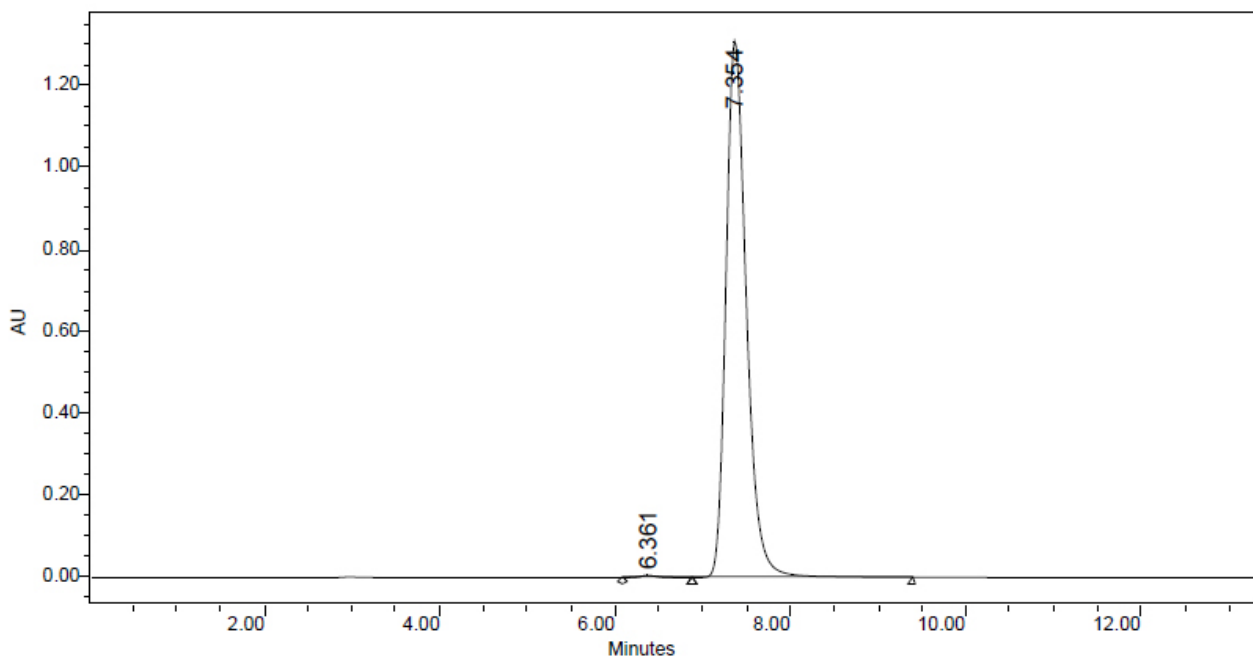

|   | RT (min) | Area (V*sec) | % Area | Height (V) | % Height |
|---|----------|--------------|--------|------------|----------|
| 1 | 6.361    | 62431        | 0.29   | 4695       | 0.36     |
| 2 | 7.354    | 21220248     | 99.71  | 1312583    | 99.64    |

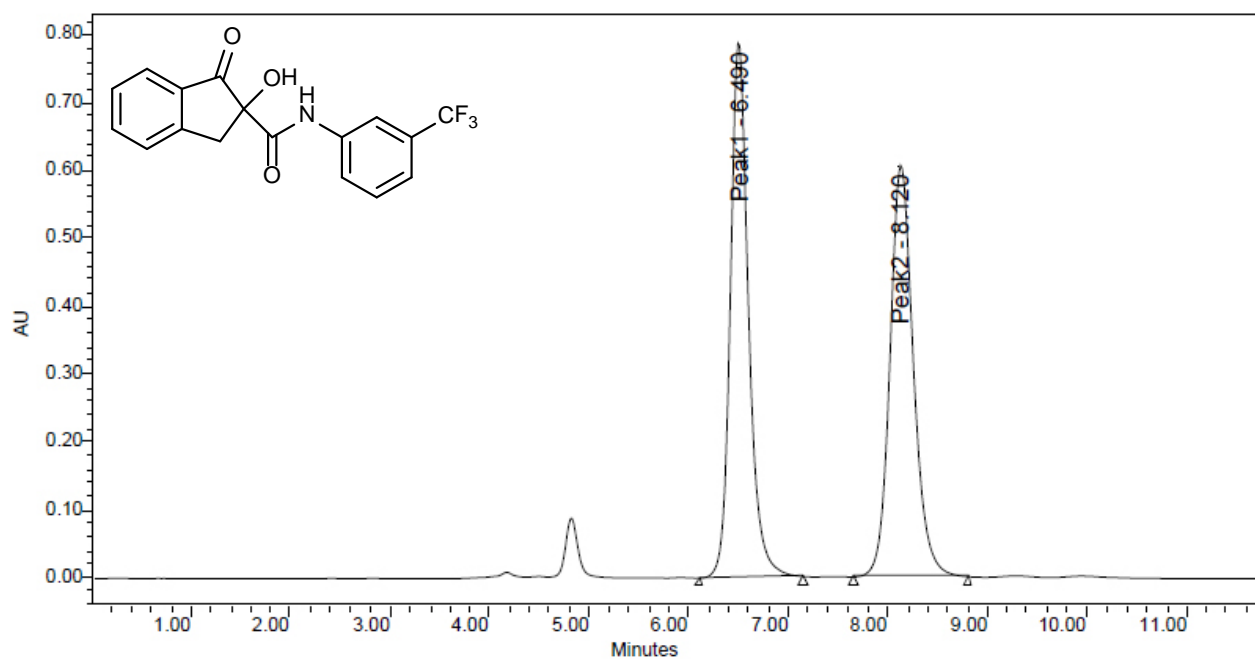

| Peak Name | RT (min) | Area (UV*sec) | % Area | Height (UV) | % Height |
|-----------|----------|---------------|--------|-------------|----------|
| 1 Peak1   | 6.490    | 10027692      | 50.23  | 790767      | 56.57    |
| 2 Peak2   | 8.120    | 9935166       | 49.77  | 607191      | 43.43    |

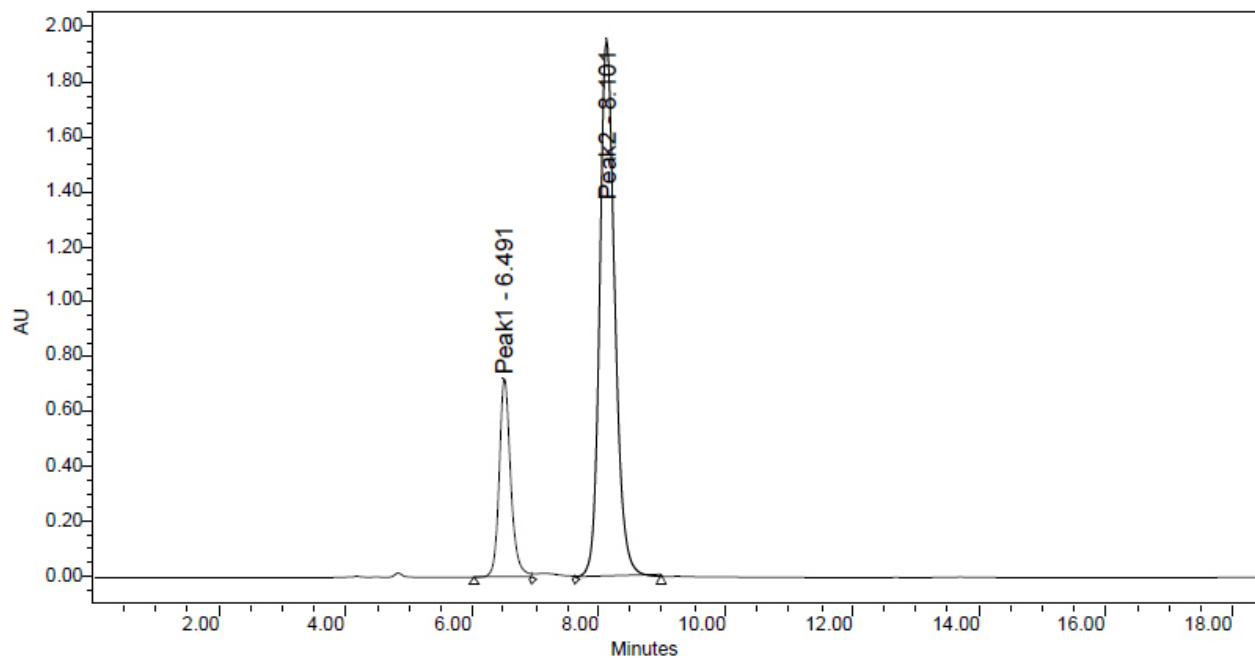

| Peak Name | RT (min) | Area (UV*sec) | % Area | Height (UV) | % Height |
|-----------|----------|---------------|--------|-------------|----------|
| 1 Peak1   | 6.491    | 9129224       | 21.93  | 723239      | 27.07    |
| 2 Peak2   | 8.101    | 32490831      | 78.07  | 1948876     | 72.93    |

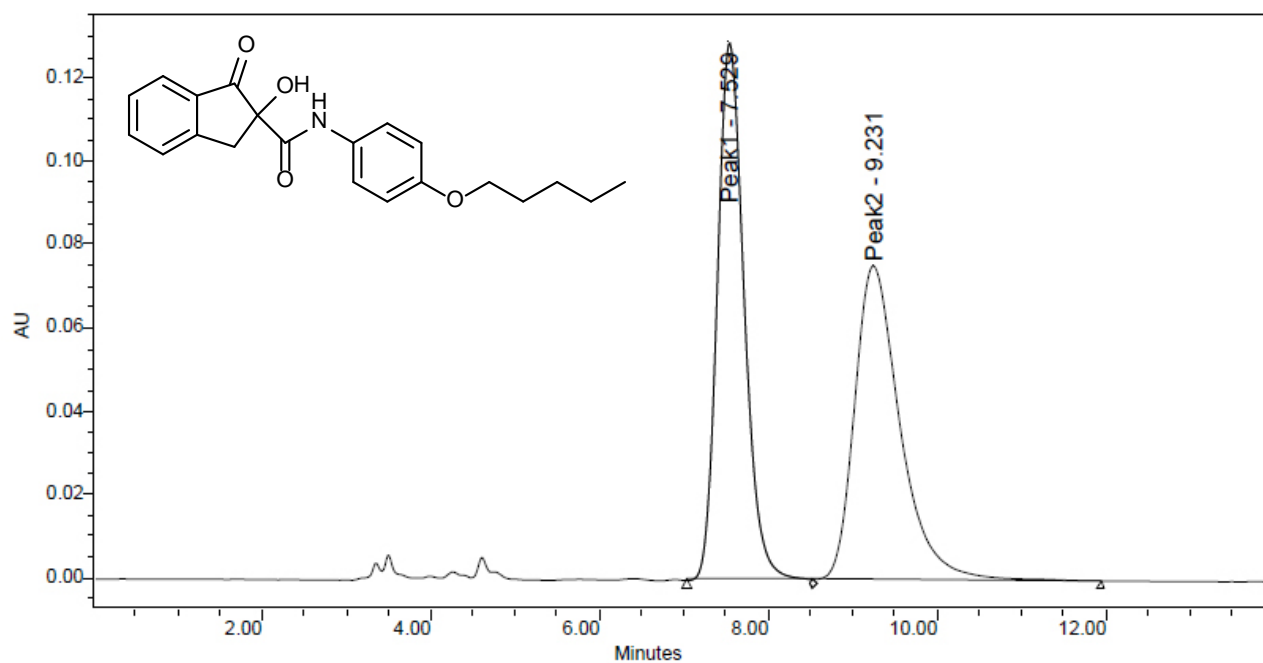

| Peak Name | RT (min) | Area (UV*sec) | % Area | Height (UV) | % Height |
|-----------|----------|---------------|--------|-------------|----------|
| 1 Peak1   | 7.529    | 2850108       | 49.94  | 129028      | 63.06    |
| 2 Peak2   | 9.231    | 2856829       | 50.06  | 75589       | 36.94    |

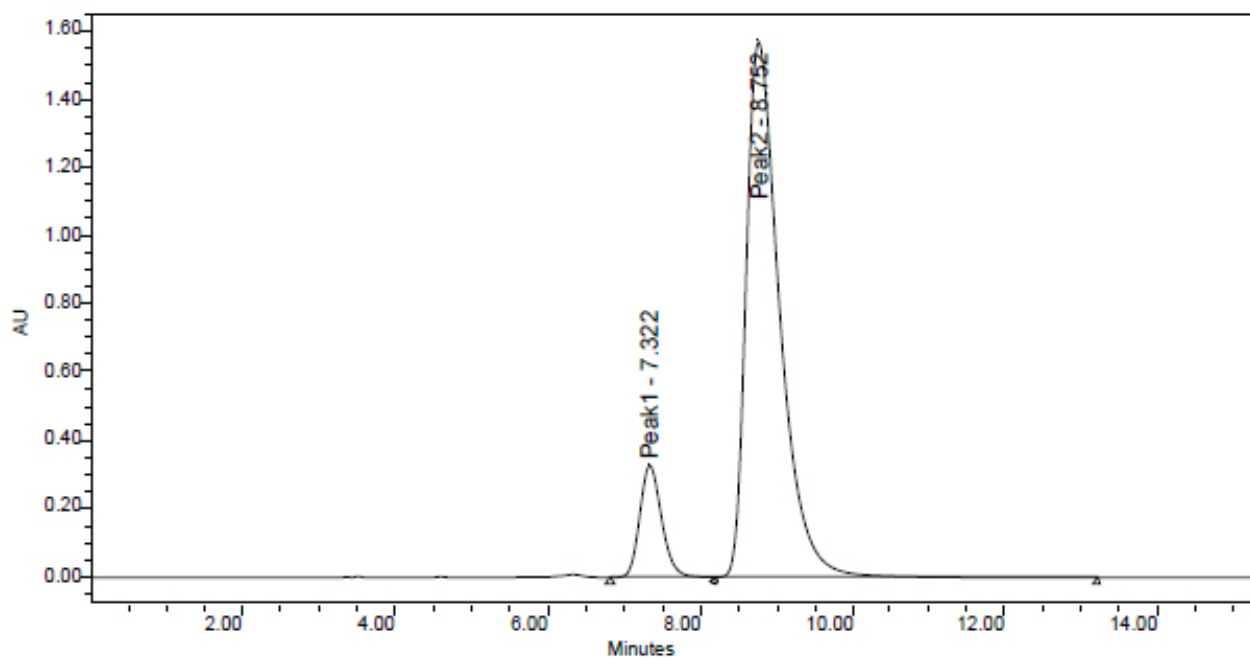

| Peak Name | RT (min) | Area (UV*sec) | % Area | Height (UV) | % Height |
|-----------|----------|---------------|--------|-------------|----------|
| 1 Peak1   | 7.322    | 6545223       | 12.00  | 327689      | 17.26    |
| 2 Peak2   | 8.752    | 48005075      | 88.00  | 1570418     | 82.74    |

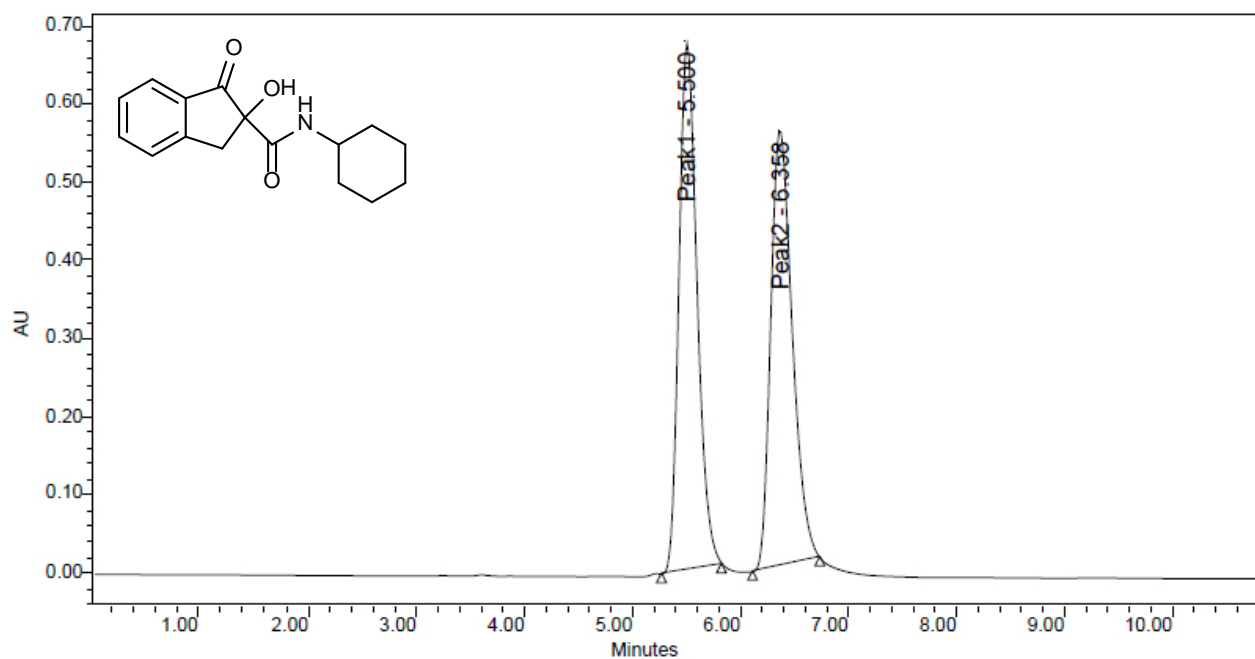

|   | Peak Name | RT (min) | Area (V*sec) | % Area | Height (V) | % Height |
|---|-----------|----------|--------------|--------|------------|----------|
| 1 | Peak1     | 5.500    | 7856069      | 50.41  | 674088     | 54.68    |
| 2 | Peak2     | 6.358    | 7727144      | 49.59  | 558787     | 45.32    |

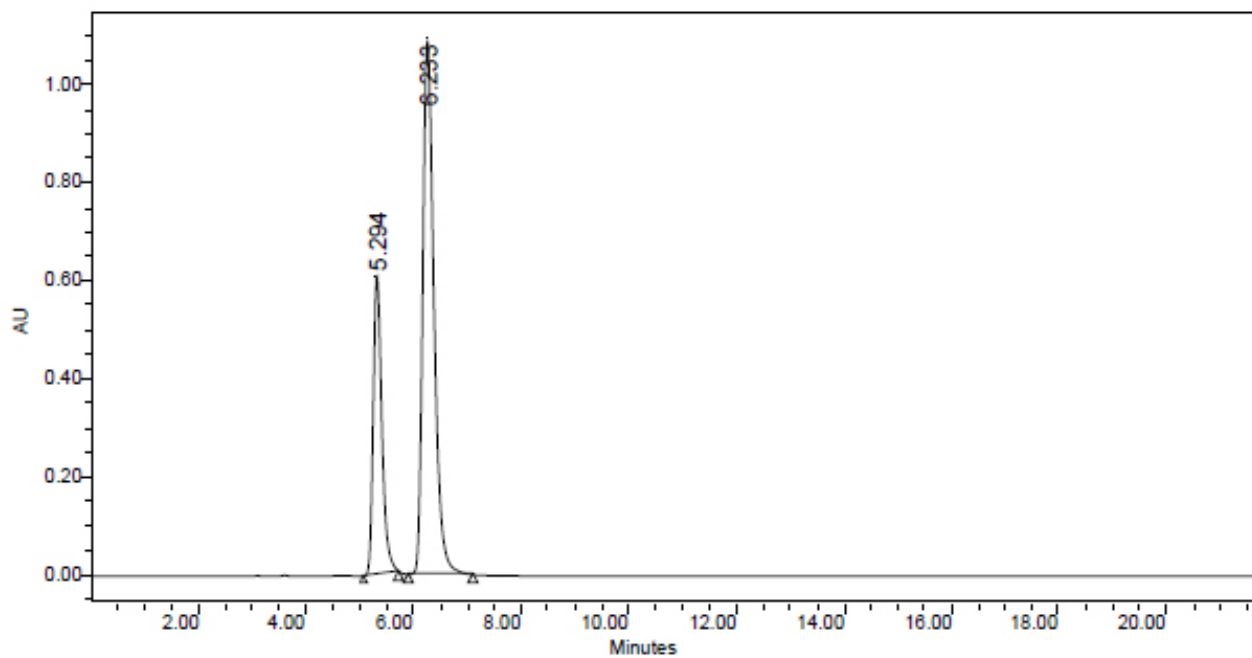

|   | RT (min) | Area (V*sec) | % Area | Height (V) | % Height |
|---|----------|--------------|--------|------------|----------|
| 1 | 5.294    | 6833475      | 30.25  | 609975     | 35.89    |
| 2 | 6.233    | 15759411     | 69.75  | 1089580    | 64.11    |



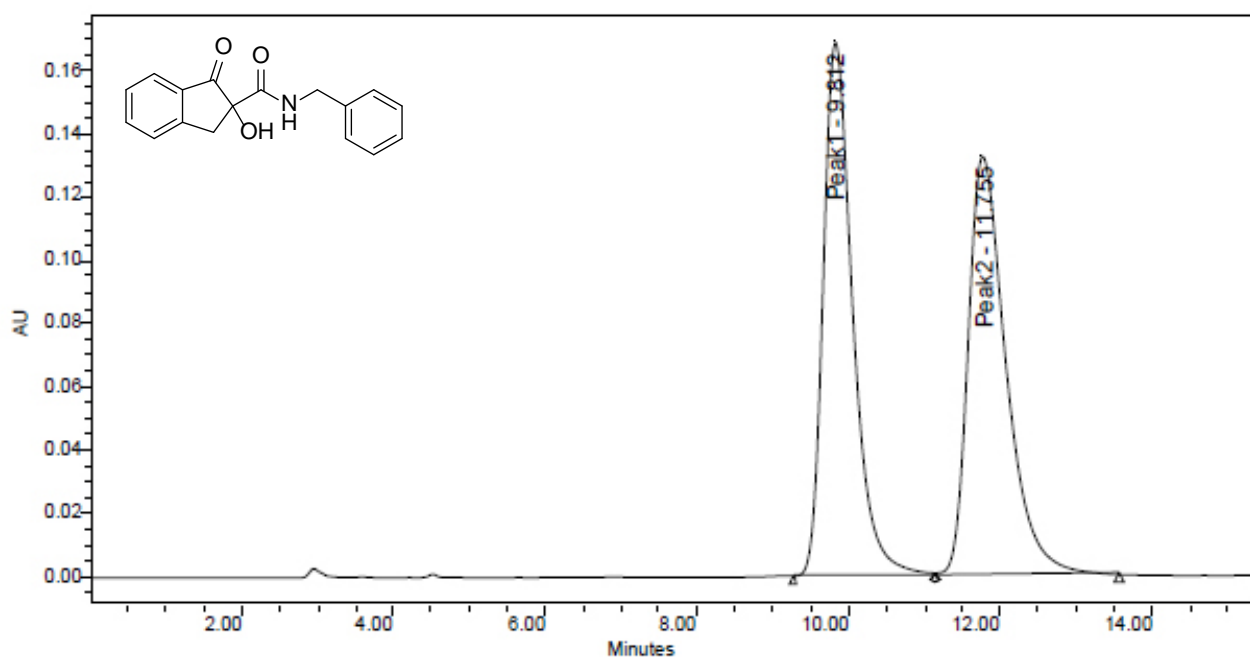

| Peak Name | RT (min) | Area (V*sec) | % Area | Height (V) | % Height |
|-----------|----------|--------------|--------|------------|----------|
| 1 Peak1   | 9.812    | 4563934      | 49.81  | 168646     | 56.01    |
| 2 Peak2   | 11.755   | 4598046      | 50.19  | 132471     | 43.99    |

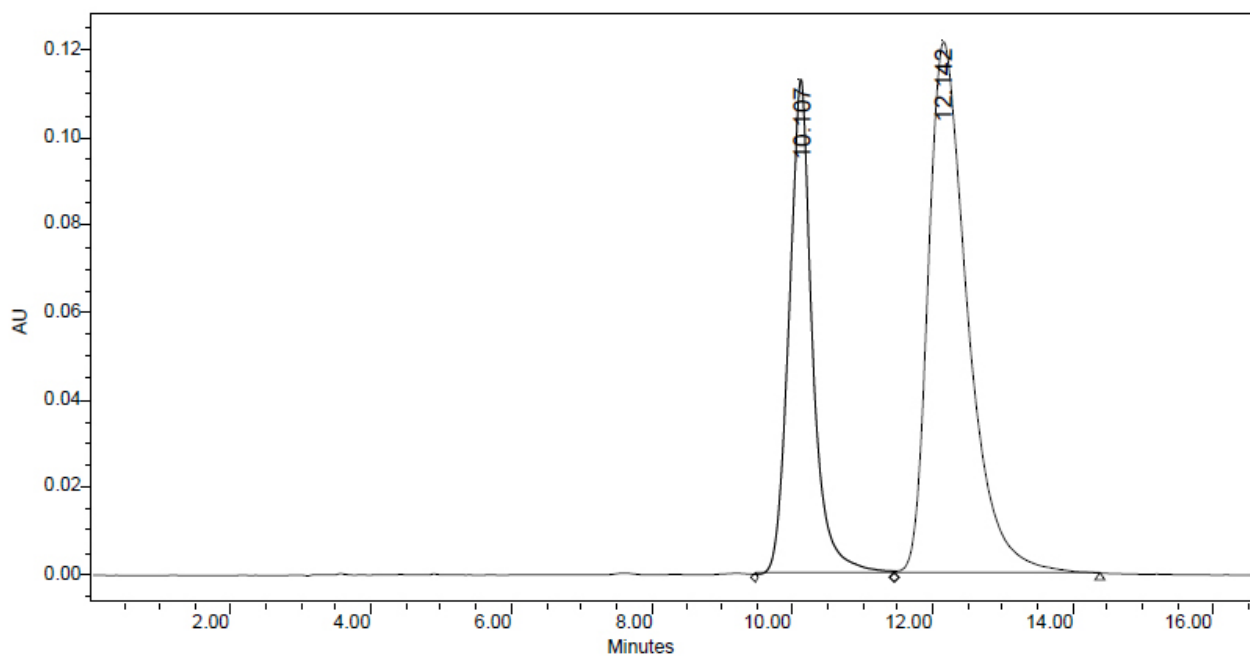

| Peak Name | RT (min) | Area (V*sec) | % Area | Height (V) | % Height |
|-----------|----------|--------------|--------|------------|----------|
| 1         | 10.107   | 2644555      | 35.75  | 113518     | 48.23    |
| 2         | 12.142   | 4752319      | 64.25  | 121835     | 51.77    |
